# Supplementary material for: Chronic neurotransmission increases the susceptibility of lateral-line hair cells to ototoxic insults
Source: eLife. 2022 Sep 1;11:e77775. doi: 10.7554/eLife.77775 (PMC9473691; doi:10.7554/eLife.77775)
Supplement: Figure 1—figure supplement 1—source data 1. [file elife-77775-fig1-figsupp1-data1.xlsx]

## Sheet: Figure 1-S2E
Figure 1-S2E	Number of spontaneous spikes per minute
	sib	otofb-/-	caV1.3a-/-
	517.4	23	7.6
	92.6	1.2	6.8
	398	4.4	6
	276	5.6	1.8
	235.2	1.6	1
	392.8	1.4	1.8
	1088.4	4.4
	473
	472.2
Number of afferent neurons	11	7	6
Minimum	92.6	1.2	1
Maximum	1088	23	7.6
Range	995.8	21.8	6.6
Mean	399	5.943	4.167
Std. Deviation	264.4	7.722	2.943
Std. Error of Mean	79.72	2.919	1.202
D'Agostino & Pearson test
K2	13.39	N too small	N too small
P value	0.0012
Passed normality test (alpha=0.05)?	No
P value summary	**
Kruskal-Wallis test
Dunn's multiple comparisons test	Mean rank diff.	Significant?	Summary	Adjusted P Value	A-?
sib vs. otofb-/-	12.43	Yes	***	0.0006	B	otofb-/-
sib vs. caV1.3a-/-	11.5	Yes	**	0.0027	C	caV1.3a-/-
Test details	Mean rank 1	Mean rank 2	Mean rank diff.	n1	n2	Z
sib vs. otofb-/-	19	6.571	12.43	11	7	3.637
sib vs. caV1.3a-/-	19	7.5	11.5	11	6	3.206
