# Supplementary material for: Chronic neurotransmission increases the susceptibility of lateral-line hair cells to ototoxic insults
Source: eLife. 2022 Sep 1;11:e77775. doi: 10.7554/eLife.77775 (PMC9473691; doi:10.7554/eLife.77775)
Supplement: Figure 1—figure supplement 2—source data 1. [file elife-77775-fig1-figsupp2-data1.xlsx]

## Sheet: Figure 1-S1A
Figure 1-S1A	Baseline GCaMP6s intensitiy in hair bundles
	sib	cav1.3a-/-	otofb-/-
	1478	1848	1459
	1560	2516	1069
	1604	2318	1160
	1394	2234	1015
	1389	1968	2054
	1692	1632	1742
	1781	1362	2721
	1703	2632	1409
	2249	2875	1928
		3050	2113
Number of neuromasts	9	9	9
Minimum	1389	1362	1015
Maximum	2249	3050	2721
Range	860	1688	1706
Mean	1650	2245	1624
Std. Deviation	263.2	577	560.9
Std. Error of Mean	87.72	192.3	187
D'Agostino & Pearson test
K2	8.135	0.4275	0.7722
P value	0.0171	0.8076	0.6797
Passed normality test (alpha=0.05)?	No	Yes	Yes
P value summary	*	ns	ns
Kruskal-Wallis test
Dunn's multiple comparisons test	Mean rank diff.	Significant?	Summary	Adjusted P Value	A-?
sib vs. cav1.3a-/-	-7.667	No	ns	0.0809	B	cav1.3a-/-
sib vs. otofb-/-	0.6667	No	ns	>0.9999	C	otofb-/-
Test details	Mean rank 1	Mean rank 2	Mean rank diff.	n1	n2	Z
sib vs. cav1.3a-/-	11.67	19.33	-7.667	9	9	2.049
sib vs. otofb-/-	11.67	11	0.6667	9	9	0.1782

## Sheet: Figure 1-S1B
Figure 1-S1B	Slope of the MET-dependent GCaMP6s responses (500 ms stimulus)
	sib	cav1.3a-/-	otofb-/-
	160.782	187.21	106.357
	73.4123	71.7667	109.979
	89.4837	111.499	141.742
	209.207	116.379	163.21
	97.7304	83.3601	110.65
	93.4413	71.5689	102.695
	126.566	139.017	136.57
	101.899	59.6657	180.487
	184.814	67.8681	86.0411
Number of neuromasts	9	9	9
Minimum	73.41	59.67	86.04
Maximum	209.2	187.2	180.5
Range	135.8	127.5	94.45
Mean	126.4	100.9	126.4
Std. Deviation	47.61	41.93	31.08
Std. Error of Mean	15.87	13.98	10.36
D'Agostino & Pearson test
K2	1.536	3.359	0.9086
P value	0.4638	0.1865	0.6349
Passed normality test (alpha=0.05)?	Yes	Yes	Yes
P value summary	ns	ns	ns
one-way ANOVA
Dunnett's multiple comparisons test	Mean Diff.	95.00% CI of diff.	Significant?	Summary	Adjusted P Value	A-?
sib vs. cav1.3a-/-	25.44	-19.73 to 70.62	No	ns	0.328	B	cav1.3a-/-
sib vs. otofb-/-	-0.04409	-45.22 to 45.13	No	ns	>0.9999	C	otofb-/-
Test details	Mean 1	Mean 2	Mean Diff.	SE of diff.	n1	n2	q	DF
sib vs. cav1.3a-/-	126.4	100.9	25.44	19.23	9	9	1.323	24
sib vs. otofb-/-	126.4	126.4	-0.04409	19.23	9	9	0.002293	24

## Sheet: Figure 1-S1C
Figure 1-S1C	Duration of the MET-dependent GCaMP6s responses (500 ms stimulus)
	sib	cav1.3a-/-	otofb-/-
	0.4	0.5	0.7
	0.7	0.8	0.7
	0.8	0.7	0.4
	0.5	0.6	0.5
	0.7	0.8	0.7
	0.7	0.7	0.7
	0.7	0.6	0.4
	0.8	0.7	0.4
	0.3	0.7	0.7
Number of neuromasts	9	9	9
Minimum	0.3	0.5	0.4
Maximum	0.8	0.8	0.7
Range	0.5	0.3	0.3
Mean	0.6222	0.6778	0.5778
Std. Deviation	0.1787	0.09718	0.1481
Std. Error of Mean	0.05958	0.03239	0.04938
D'Agostino & Pearson test
K2	1.773	0.5453	6.108
P value	0.4122	0.7614	0.0472
Passed normality test (alpha=0.05)?	Yes	Yes	No
P value summary	ns	ns	*
Kruskal-Wallis test
Dunn's multiple comparisons test	Mean rank diff.	Significant?	Summary	Adjusted P Value	A-?
sib vs. cav1.3a-/-	-1.611	No	ns	>0.9999	B	cav1.3a-/-
sib vs. otofb-/-	3.111	No	ns	0.7515	C	otofb-/-
Test details	Mean rank 1	Mean rank 2	Mean rank diff.	n1	n2	Z
sib vs. cav1.3a-/-	14.5	16.11	-1.611	9	9	0.4587
sib vs. otofb-/-	14.5	11.39	3.111	9	9	0.8857

## Sheet: Figure 1-S1D
Figure 1-S1D	Halflife of return to baseline- MET-dependent GCaMP6s responses (500 ms stimulus)
	sib	cav1.3a-/-	otofb-/-
	0.6412	0.5338	0.9751
	0.7175	0.5758	0.7454
	0.8014	0.656	0.4645
	0.7919	0.5548	1.138
	0.8841	0.7287	0.6626
	0.7236	0.7552	0.9415
	0.6933	0.4896	0.6701
	0.6406	0.5133	0.7738
	0.8416	0.4334	0.7296
Number of neuromasts	9	9	9
Minimum	0.6406	0.4334	0.4645
Maximum	0.8841	0.7552	1.138
Range	0.2435	0.3218	0.6735
Mean	0.7484	0.5823	0.789
Std. Deviation	0.08626	0.1092	0.2002
Std. Error of Mean	0.02875	0.03641	0.06675
D'Agostino & Pearson test
K2	0.85	0.8272	0.2454
P value	0.6538	0.6613	0.8845
Passed normality test (alpha=0.05)?	Yes	Yes	Yes
P value summary	ns	ns	ns
one-way ANOVA
Dunnett's multiple comparisons test	Mean Diff.	95.00% CI of diff.	Significant?	Summary	Adjusted P Value	A-?
sib vs. cav1.3a-/-	0.1661	0.01013 to 0.3220	Yes	*	0.036	B	cav1.3a-/-
sib vs. otofb-/-	-0.0406	-0.1965 to 0.1153	No	ns	0.7676	C	otofb-/-
Test details	Mean 1	Mean 2	Mean Diff.	SE of diff.	n1	n2	q	DF
sib vs. cav1.3a-/-	0.7484	0.5823	0.1661	0.06637	9	9	2.502	24
sib vs. otofb-/-	0.7484	0.789	-0.0406	0.06637	9	9	0.6117	24

## Sheet: Figure 1-S1E
Figure 1-S1E	Magnitude of the MET-dependent GCaMP6s response (200 ms stimulus)
	sib	cav1.3a-/-	otofb-/-
	42.2991	88.457	75.4295
	43.4155	49.6721	58.9301
	47.9641	52.188	49.6774
	73.0072	51.8793	61.3004
	49.2575	45.5985	91.8542
	51.8398	44.3637	64.5855
	52.1253	64.6615	45.2263
	49.4241	59.991	57.6978
	36.6423	38.8	41.0745
Number of values	9	9	9
Minimum	36.64	38.8	41.07
Maximum	73.01	88.46	91.85
Range	36.36	49.66	50.78
Mean	49.55	55.07	60.64
Std. Deviation	10.13	14.78	15.66
Std. Error of Mean	3.378	4.927	5.219
D'Agostino & Pearson test
K2	9.252	7.907	2.148
P value	0.0098	0.0192	0.3416
Passed normality test (alpha=0.05)?	No	No	Yes
P value summary	**	*	ns
Kruskal-Wallis test
Dunn's multiple comparisons test	Mean rank diff.	Significant?	Summary	Adjusted P Value	A-?
sib vs. cav1.3a-/-	-3.889	No	ns	0.5973	B	cav1.3a-/-
sib vs. otofb-/-	-6.778	No	ns	0.1401	C	otofb-/-
Test details	Mean rank 1	Mean rank 2	Mean rank diff.	n1	n2	Z
sib vs. cav1.3a-/-	10.44	14.33	-3.889	9	9	1.039
sib vs. otofb-/-	10.44	17.22	-6.778	9	9	1.811

## Sheet: Figure 1-S1F
Figure 1-S1F	Slope of the MET-dependent GCaMP6s responses (200 ms stimulus)
	sib	cav1.3a-/-	otofb-/-
	140.997	221.143	150.859
	108.539	124.18	147.325
	119.91	130.47	165.591
	182.518	129.698	204.335
	123.144	75.9976	183.708
	129.6	110.909	161.464
	130.313	161.654	113.066
	123.56	149.977	144.244
	91.6058	129.333	102.686
Number of neuromasts	9	9	9
Minimum	91.61	76	102.7
Maximum	182.5	221.1	204.3
Range	90.91	145.1	101.6
Mean	127.8	137	152.6
Std. Deviation	24.9	39.65	31.71
Std. Error of Mean	8.301	13.22	10.57
D'Agostino & Pearson test
K2	5.863	4.247	0.02028
P value	0.0533	0.1196	0.9899
Passed normality test (alpha=0.05)?	Yes	Yes	Yes
P value summary	ns	ns	ns
one-way ANOVA
Dunnett's multiple comparisons test	Mean Diff.	95.00% CI of diff.	Significant?	Summary	Adjusted P Value	A-?
sib vs. cav1.3a-/-	-9.242	-45.40 to 26.92	No	ns	0.7748	B	cav1.3a-/-
sib vs. otofb-/-	-24.79	-60.95 to 11.37	No	ns	0.2067	C	otofb-/-
Test details	Mean 1	Mean 2	Mean Diff.	SE of diff.	n1	n2	q	DF
sib vs. cav1.3a-/-	127.8	137	-9.242	15.39	9	9	0.6004	24
sib vs. otofb-/-	127.8	152.6	-24.79	15.39	9	9	1.611	24

## Sheet: Figure 1-S1G
Figure 1-S1G	Duration of the MET-dependent GCaMP6s responses (200 ms stimulus)
	sib	cav1.3a-/-	otofb-/-
	0.3	0.4	0.5
	0.4	0.4	0.4
	0.4	0.4	0.3
	0.4	0.4	0.5
	0.4	0.6	0.5
	0.4	0.4	0.4
	0.4	0.4	0.4
	0.4	0.4	0.4
	0.4	0.3	0.4
Number of values	9	9	9
Minimum	0.3	0.3	0.3
Maximum	0.4	0.6	0.5
Range	0.1	0.3	0.2
Mean	0.3889	0.4111	0.4222
Std. Deviation	0.03333	0.07817	0.06667
Std. Error of Mean	0.01111	0.02606	0.02222
D'Agostino & Pearson test
K2	25.84	13.06	0.1578
P value	<0.0001	0.0015	0.9241
Passed normality test (alpha=0.05)?	No	No	Yes
P value summary	****	**	ns
Kruskal-Wallis test
Dunn's multiple comparisons test	Mean rank diff.	Significant?	Summary	Adjusted P Value	A-?
sib vs. cav1.3a-/-	-1.5	No	ns	>0.9999	B	cav1.3a-/-
sib vs. otofb-/-	-3.833	No	ns	0.3657	C	otofb-/-
Test details	Mean rank 1	Mean rank 2	Mean rank diff.	n1	n2	Z
sib vs. cav1.3a-/-	12.22	13.72	-1.5	9	9	0.5212
sib vs. otofb-/-	12.22	16.06	-3.833	9	9	1.332

## Sheet: Figure 1-S1H
Figure 1-S1H	Halflife of return to baseline- MET-dependent GCaMP6s responses (@00 ms stimulus)
	sib	cav1.3a-/-	otofb-/-
	0.4725	0.4299	0.5192
	0.4425	0.4086	0.4601
	0.5211	0.4294	0.4088
	0.7943	0.4325	0.8133
	0.7826	0.4473	0.4791
	0.8492	0.4101	0.7561
	0.4714	0.5064	0.6038
	0.5473	0.4225	0.6059
	0.6246	0.3427	0.9383
Number of neuromasts	9	9	9
Minimum	0.4425	0.3427	0.4088
Maximum	0.8492	0.5064	0.9383
Range	0.4067	0.1637	0.5295
Mean	0.6117	0.4255	0.6205
Std. Deviation	0.1578	0.04256	0.1795
Std. Error of Mean	0.05259	0.01419	0.05984
D'Agostino & Pearson test
K2	2.621	2.982	1.061
P value	0.2697	0.2251	0.5882
Passed normality test (alpha=0.05)?	Yes	Yes	Yes
P value summary	ns	ns	ns
one-way ANOVA
Dunnett's multiple comparisons test	Mean Diff.	95.00% CI of diff.	Significant?	Summary	Adjusted P Value	A-?
sib vs. cav1.3a-/-	0.1862	0.03099 to 0.3415	Yes	*	0.0178	B	cav1.3a-/-
sib vs. otofb-/-	-0.008789	-0.1640 to 0.1465	No	ns	0.9871	C	otofb-/-
Test details	Mean 1	Mean 2	Mean Diff.	SE of diff.	n1	n2	q	DF
sib vs. cav1.3a-/-	0.6117	0.4255	0.1862	0.06607	9	9	2.819	24
sib vs. otofb-/-	0.6117	0.6205	-0.008789	0.06607	9	9	0.133	24

## Sheet: Figure 1-S1I
Figure 1-S1I	Baseline GCaMP6s intensitiy at the base/presynapse
	sib	cav1.3a-/-	otofb-/-
	1109	480.6	702.5
	1430	510.8	821.2
	1073	498.5	887.2
	664.6	559.1	549.4
	680.1	658.3	589.2
	886.8	676.5	590
	666.1	476.7	652.7
	721.8	502.9	862
	817.9	478.1	796.7
Number of neuromasts	9	9	9
Minimum	664.6	476.7	549.4
Maximum	1430	676.5	887.2
Range	765.4	199.8	337.8
Mean	894.4	537.9	716.8
Std. Deviation	262.5	77.68	128.5
Std. Error of Mean	87.51	25.89	42.83
D'Agostino & Pearson test
K2	3.079	3.089	2.999
P value	0.2145	0.2134	0.2232
Passed normality test (alpha=0.05)?	Yes	Yes	Yes
P value summary	ns	ns	ns
one-way ANOVA
Dunnett's multiple comparisons test	Mean Diff.	95.00% CI of diff.	Significant?	Summary	Adjusted P Value	A-?
sib vs. cav1.3a-/-	356.4	163.0 to 549.8	Yes	***	0.0005	B	cav1.3a-/-
sib vs. otofb-/-	177.6	-15.80 to 371.0	No	ns	0.0743	C	otofb-/-
Test details	Mean 1	Mean 2	Mean Diff.	SE of diff.	n1	n2	q	DF
sib vs. cav1.3a-/-	894.4	537.9	356.4	82.31	9	9	4.33	24
sib vs. otofb-/-	894.4	716.8	177.6	82.31	9	9	2.158	24

## Sheet: Figure 1-S1J
Figure 1-S1J	Slope of the presynaptic GCaMP6s responses (500 ms stimulus)
	sib	otofb-/-
	67.9413	140.003
	73.9094	202.537
	172.636	62.5405
	181.101	222.561
	202.601	156.11
	79.1971	226.465
	104.881	154.605
	176.867	113.584
	165.065	96.763
Number of values	9	9
Minimum	67.94	62.54
Maximum	202.6	226.5
Range	134.7	163.9
Mean	136	152.8
Std. Deviation	53.63	56.76
Std. Error of Mean	17.88	18.92
D'Agostino & Pearson test
K2	4.523	0.5179
P value	0.1042	0.7719
Passed normality test (alpha=0.05)?	Yes	Yes
P value summary	ns	ns
Table Analyzed	500ms slope
Column B	otofb-/-
vs.	vs.
Column A	sib
Unpaired t test
P value	0.5284
P value summary	ns
Significantly different (P < 0.05)?	No
One- or two-tailed P value?	Two-tailed
t, df	t=0.6445, df=16
How big is the difference?
Mean of column A	136
Mean of column B	152.8
Difference between means (B - A) ± SEM	16.77 ± 26.03
95% confidence interval	-38.40 to 71.95
R squared (eta squared)	0.0253
F test to compare variances
F, DFn, Dfd	1.120, 8, 8
P value	0.8766
P value summary	ns
Significantly different (P < 0.05)?	No

[truncated: 2 more sheets: Figure 1-S1K, Figure 1-S1L]
