# Supplementary material for: Chronic neurotransmission increases the susceptibility of lateral-line hair cells to ototoxic insults
Source: eLife. 2022 Sep 1;11:e77775. doi: 10.7554/eLife.77775 (PMC9473691; doi:10.7554/eLife.77775)
Supplement: Figure 1—source data 1. [file elife-77775-fig1-data1.xlsx]

## Sheet: Figure 1F`
Figure 1 F'	Magnitude of MET-dependent GCaMP6s responses (deltaF/F) (500 ms stimulus)
	sib	cav1.3a-/-	otofb-/-
	64.3127	93.6049	74.4502
	51.3886	57.4134	76.9856
	71.587	78.0492	56.6968
	104.603	69.8275	81.605
	68.4113	66.6881	77.455
	65.4089	50.0982	71.8867
	88.5961	83.4102	54.6279
	81.5193	41.766	72.1948
	55.4441	47.5077	60.2288
Number of neuromasts	9	9	9
Minimum	51.39	41.77	54.63
Maximum	104.6	93.6	81.61
Range	53.21	51.84	26.98
Mean	72.36	65.37	69.57
Std. Deviation	16.74	17.6	9.838
Std. Error of Mean	5.581	5.866	3.279
D'Agostino & Pearson test
K2	1.492	0.7639	1.817
P value	0.4743	0.6825	0.4031
Passed normality test (alpha=0.05)?	Yes	Yes	Yes
P value summary	ns	ns	ns
one-way ANOVA
Dunnett's multiple comparisons test	Mean Diff.	95.00% CI of diff.	Significant?	Summary	Adjusted P Value	A-?
sib vs. cav1.3a-/-	6.99	-9.769 to 23.75	No	ns	0.5247	B	cav1.3a-/-
sib vs. otofb-/-	2.793	-13.96 to 19.55	No	ns	0.8951	C	otofb-/-
Test details	Mean 1	Mean 2	Mean Diff.	SE of diff.	n1	n2	q	DF
sib vs. cav1.3a-/-	72.36	65.37	6.99	7.133	9	9	0.9799	24
sib vs. otofb-/-	72.36	69.57	2.793	7.133	9	9	0.3916	24

## Sheet: Figure 1H`
Figure H'	Magnitude of presynaptic GCaMP6s responses (deltaF/F) (500 ms stimulus)
	sib	cav1.3a-/-	otofb-/-
	54.353	0	84.002
	44.3457	0	121.522
	103.582	8.1463	37.5243
	108.661	0	111.281
	101.3	0	93.6661
	47.5183	0	113.233
	52.4407	0	92.7627
	106.12	0	56.7919
	99.0389	5.2551	58.0578
Number of neuromasts	9	9	9
Minimum	44.35	0	37.52
Maximum	108.7	8.146	121.5
Range	64.31	8.146	84
Mean	79.71	1.489	85.43
Std. Deviation	28.76	3.042	29.01
Std. Error of Mean	9.588	1.014	9.669
D'Agostino & Pearson test
K2	7.515	8.632	0.991
P value	0.0233	0.0134	0.6093
Passed normality test (alpha=0.05)?	No	No	Yes
P value summary	*	*	ns
Kruskal-Wallis test
Dunn's multiple comparisons test	Mean rank diff.	Significant?	Summary	Adjusted P Value	A-?
sib vs. cav1.3a-/-	12.78	Yes	**	0.0011	B	cav1.3a-/-
sib vs. otofb-/-	-1.444	No	ns	>0.9999	C	otofb-/-
Test details	Mean rank 1	Mean rank 2	Mean rank diff.	n1	n2	Z
sib vs. cav1.3a-/-	17.78	5	12.78	9	9	3.445
sib vs. otofb-/-	17.78	19.22	-1.444	9	9	0.3894

## Sheet: Figure 1J`
Figure 1J'	Magnitude of SypHy responses (deltaF/F) (2 s-5Hz stimulus)
	sib	caV1.3a-/-	otofb-/-
	10.2976	0	2.1284
	11.6923	0.599	1.1427
	16.0715	0.6768	1.0681
	15.5629	0	1.2162
	9.6802	0.6986	0
	13.4646	0.2028	1.0245
	15.7334	1.5686	1.3537
	10.0117	0.7815	1.9347
	17.135	1.2151	1.2151
Number of neuromasts	9	9	9
Minimum	9.68	0	0
Maximum	17.14	1.569	2.128
Range	7.455	1.569	2.128
Mean	13.29	0.638	1.231
Std. Deviation	2.936	0.5279	0.6029
Std. Error of Mean	0.9787	0.176	0.201
D'Agostino & Pearson test
K2	3.869	0.3939	2.486
P value	0.1445	0.8212	0.2885
Passed normality test (alpha=0.05)?	Yes	Yes	Yes
P value summary	ns	ns	ns
one-way ANOVA
Dunnett's multiple comparisons test	Mean Diff.	95.00% CI of diff.	Significant?	Summary	Adjusted P Value	A-?
sib vs. caV1.3a-/-	12.66	10.71 to 14.60	Yes	****	<0.0001	B	caV1.3a-/-
sib vs. otofb-/-	12.06	10.12 to 14.01	Yes	****	<0.0001	C	otofb-/-
Test details	Mean 1	Mean 2	Mean Diff.	SE of diff.	n1	n2	q	DF
sib vs. caV1.3a-/-	13.29	0.638	12.66	0.8284	9	9	15.28	24
sib vs. otofb-/-	13.29	1.231	12.06	0.8284	9	9	14.56	24
