# Supplementary material for: Chronic neurotransmission increases the susceptibility of lateral-line hair cells to ototoxic insults
Source: eLife. 2022 Sep 1;11:e77775. doi: 10.7554/eLife.77775 (PMC9473691; doi:10.7554/eLife.77775)
Supplement: Figure 2—figure supplement 1—source data 1. [file elife-77775-fig2-figsupp1-data1.xlsx]

## Sheet: Figure 2-S1A
Figure 2-S1A	MET-dependent GCaMP6s response (deltaF/F) before and after mock treatment
	naive	mock treatment
	89.4204	98.5737
	86.8793	89.4793
	72.1442	74.3605
	107.622	84.9126
	61.2973	105.167
	137.292	130.274
	79.6553	105.803
	73.6576	82.7999
Number of neuromasts	8	8
Minimum	61.3	74.36
Maximum	137.3	130.3
Range	75.99	55.91
Mean	88.5	96.42
Std. Deviation	24.07	17.6
Std. Error of Mean	8.51	6.222
D'Agostino & Pearson test
K2	4.358	1.937
P value	0.1132	0.3796
Passed normality test (alpha=0.05)?	Yes	Yes
P value summary	ns	ns
Paired t test
P value	0.3033
P value summary	ns
Significantly different (P < 0.05)?	No
One- or two-tailed P value?	Two-tailed
t, df	t=1.111, df=7
Number of pairs	8

## Sheet: Figure 2-S1B
Figure 2-S1B	MET-dependent GCaMP6s response (deltaF/F) before and after 2.5uM dynole treatment
	naive	2.5 µM dynole treatment
	117.438	72.8794
	111.645	102.864
	116.69	138.621
	111.886	127.257
	87.1282	103.512
	77.6874	87.4547
	73.7595	82.9828
	105.237	77.2668
	57.2155	72.4168
Number of neuromasts	9	9
Minimum	57.22	72.42
Maximum	117.4	138.6
Range	60.22	66.2
Mean	95.41	96.14
Std. Deviation	22.02	23.93
Std. Error of Mean	7.341	7.977
D'Agostino & Pearson test
K2	1.454	1.476
P value	0.4834	0.478
Passed normality test (alpha=0.05)?	Yes	Yes
P value summary	ns	ns
Paired t test
P value	0.9265
P value summary	ns
Significantly different (P < 0.05)?	No
One- or two-tailed P value?	Two-tailed
t, df	t=0.09514, df=8
Number of pairs	9

## Sheet: Figure 2-S1C
Figure 2-S1c	presynatpic GCaMP6s response (deltaF/F) before and after mock treatment
	naive	mock treatment
	247.979	158.222
	132.329	140.885
	142.927	178.7
	132.085	213.135
	132.585	238.403
	172.398	142.36
	127.124	94.4778
	37.5938	30.9726
Number of neuromasts	8	8
Minimum	37.59	30.97
Maximum	248	238.4
Range	210.4	207.4
Mean	140.6	149.6
Std. Deviation	57.99	65.56
Std. Error of Mean	20.5	23.18
D'Agostino & Pearson test
K2	2.529	0.821
P value	0.2824	0.6633
Passed normality test (alpha=0.05)?	Yes	Yes
P value summary	ns	ns
Paired t test
P value	0.7015
P value summary	ns
Significantly different (P < 0.05)?	No
One- or two-tailed P value?	Two-tailed
t, df	t=0.3994, df=7
Number of pairs	8

## Sheet: Figure 2-S1D
Figure 2-S1D	presynaptic GCaMP6s response (deltaF/F) before and after 2.5uM dynole treatment
	naive	2.5 µM dynole treatment
	125.388	155.876
	171.044	167.119
	123.758	121.139
	131.003	197.056
	142.102	134.307
	73.9175	41.8055
	172.225	100.837
	126.195	66.2197
Number of neuromasts	8	8
Minimum	73.92	41.81
Maximum	172.2	197.1
Range	98.31	155.3
Mean	133.2	123
Std. Deviation	31.06	52.03
Std. Error of Mean	10.98	18.4
D'Agostino & Pearson test
K2	1.579	0.291
P value	0.454	0.8646
Passed normality test (alpha=0.05)?	Yes	Yes
P value summary	ns	ns
Paired t test
P value	0.5448
P value summary	ns
Significantly different (P < 0.05)?	No
One- or two-tailed P value?	Two-tailed
t, df	t=0.6363, df=7
Number of pairs	8

## Sheet: Figure 2-S1E
Figure 2-S1E	# afferent spike per min before and after mock treatment
	naive	mock treatment
	463.8	271.3
	203.2	234.7
	446.2	404.1
	709.9	841.2
	848.6	939.5
	105.1	76.13
	655.5	534
	157.8	121.7
	755.3	861.3
	636.6	707.3
	128.8	186.7
	391.8	431.7
Number of neurons	12	12
Minimum	105.1	76.13
Maximum	848.6	939.5
Range	743.5	863.4
Mean	458.6	467.5
Std. Deviation	264.2	305.9
Std. Error of Mean	76.27	88.29
D'Agostino & Pearson test
K2	2.877	2.557
P value	0.2372	0.2784
Passed normality test (alpha=0.05)?	Yes	Yes
P value summary	ns	ns
Paired t test
P value	0.7549
P value summary	ns
Significantly different (P < 0.05)?	No
One- or two-tailed P value?	Two-tailed
t, df	t=0.3201, df=11
Number of pairs	12

## Sheet: Figure 2-S1F
Figure 2-S1F	# afferent spike per min before and after 2.5uM dynole
	naive	2.5 µM dynole treatment
	1088	826.5
	480.3	468.9
	1150.6	608.4
	156	121.7
	389.6	280.8
	331.9	243.1
	473.6	17.9
	458.4	408.9
	619.2	292.4
	106.2	21.7
	177.6	193.8
	1683.4	1304.7
Number of neurons	12	12
Minimum	106.2	17.9
Maximum	1683	1305
Range	1577	1287
Mean	592.9	399.1
Std. Deviation	476.8	370.3
Std. Error of Mean	137.6	106.9
D'Agostino & Pearson test
K2	5.124	7.763
P value	0.0772	0.0206
Passed normality test (alpha=0.05)?	Yes	No
P value summary	ns	*
Wilcoxon matched-pairs signed rank test
P value	0.0015
Exact or approximate P value?	Exact
P value summary	**
Significantly different (P < 0.05)?	Yes
One- or two-tailed P value?	Two-tailed
Sum of positive, negative ranks	2.000 , -76.00
Sum of signed ranks (W)	-74
Number of pairs	12
Number of ties (ignored)	0
