# Supplementary material for: Chronic neurotransmission increases the susceptibility of lateral-line hair cells to ototoxic insults
Source: eLife. 2022 Sep 1;11:e77775. doi: 10.7554/eLife.77775 (PMC9473691; doi:10.7554/eLife.77775)
Supplement: Figure 2—figure supplement 2—source data 1. [file elife-77775-fig2-figsupp2-data1.xlsx]

## Sheet: Figure 2-S2C
Figure 2-S2C	% cells surving gentamicin normalized to untreated
	sib	cav1.3a-/-	sib	otofb-/-
	40.8163	71.9999	53.5619	47.7612
	56.1224	95.9998	42.8495	59.7015
	45.9184	59.9999	42.8495	47.7612
	45.9184	65.9999	42.8495	41.791
	40.8163	65.9999	42.8495	35.8209
	40.8163	41.9999	53.5619	47.7612
	30.6122	53.9999	42.8495	47.7612
	40.8163	59.9999	37.4933	41.791
	40.8163	41.9999	42.8495	47.7612
	34.375	47.9999	42.8495	47.7612
	45.8333	42.0765	48.2057	41.791
	34.375	48.0874	32.1371	47.7612
	34.375	60.1093	45.0704	47.7612
	45.8333	48.0874	39.4366	52.175
	51.5625	54.0984	33.8028	39.1313
	34.375	60.1093	39.4366	65.2188
	45.8333	48.0874	45.0704	39.1313
	28.6458	54.0984	39.4366	39.1313
	57.2917	54.0984	45.0704	65.2188
	51.5625	54.0984	45.0704	65.2188
	40.1042	42.0765	45.0704	39.1313
		36.0656	45.0704	52.175
		60.1093	45.0704	52.175
		48.0874	39.4366	58.6969
		36.0656		58.6969
Number of neuromasts	21	25	24	25
Minimum	28.65	36.07	32.14	35.82
Maximum	57.29	96	53.56	65.22
Range	28.65	59.93	21.42	29.4
Mean	42.23	54.05	43	49.16
Std. Deviation	7.877	12.83	4.952	8.786
Std. Error of Mean	1.719	2.566	1.011	1.757
D'Agostino & Pearson test
K2	0.3651	13.84	1.591	1.834
P value	0.8332	0.001	0.4514	0.3997
Passed normality test (alpha=0.05)?	Yes	No	Yes	Yes
P value summary	ns	***	ns	ns
	Column B	cav1.3a-/-	Column D	otofb-/-
	vs.	vs.	vs.	vs.
	Column A	sib	Column C	sib
	Mann Whitney test		Unpaired t test
	P value	0.0001	P value	0.0042
	Exact or approximate P value?	Exact	P value summary	**
	P value summary	***	Significantly different (P < 0.05)?	Yes
	Significantly different (P < 0.05)?	Yes	One- or two-tailed P value?	Two-tailed
	One- or two-tailed P value?	Two-tailed	t, df	t=3.009, df=47
	Sum of ranks in column A,B	327 , 754
	Mann-Whitney U	96
