# Supplementary material for: Chronic neurotransmission increases the susceptibility of lateral-line hair cells to ototoxic insults
Source: eLife. 2022 Sep 1;11:e77775. doi: 10.7554/eLife.77775 (PMC9473691; doi:10.7554/eLife.77775)
Supplement: Figure 2—source data 1. [file elife-77775-fig2-data1.xlsx]

## Sheet: Figure 2D
Figure 2D	% cells surviving neomycin per neuromast cav1.3
		sibling
	75 μM	43.75	56.25	18.75	25	53.33	37.5	35.71	44.44	25	43.75	40	37.5	21.43	55.56	77.78	64.29	62.5	57.14
	100 μM	52.94	56.25	26.67	66.67	25	25	26.67	42.11	33.33	41.18	29.41	25	30.77	38.89	50	29.41
	200 μM	8.33	6.25	42.86	22.22	44.44	37.5	18.75	21.43	22.22	31.25	31.25	16.67	27.78	11.76	42.86	10	27.78	0	28.57
		cav1.3
	75 μM	33.33	47.06	43.75	35.29	35.71	56.25	68.75	56.25	78.57	25	84.62	56.25	88.89	85.71	56.25	80	75	56.25
	100 μM	64.29	73.33	61.54	47.06	80	80	28.57	46.15	23.53	62.5	50	46.13	57.14	50	29.41	50	42.86	50	57.14
	200 μM	42.86	42.86	57.14	53.33	50	50	15.38	33.33	53.33	57.14	35.71	33.33	31.25	40	20	50	33.33
		sib			cav1.3a-/-
		mean	SEM	N (neuromasts)	mean	SEM	N (neuromasts)
	75 μM	44.4267	3.82359	18	59.0517	4.70388	18
	100 μM	37.4562	3.24724	16	52.6132	3.62069	19
	200 μM	23.7853	2.98231	19	41.1171	3.01507	17
	2-way ANOVA
	Sidak's multiple comparisons test	Predicted (LS) mean diff.	95.00% CI of diff.	Significant?	Summary	Adjusted P Value
	sib - cav1.3a-/-
	75 μM	-14.63	-27.04 to -2.208	Yes	*	0.0154
	100 μM	-15.16	-27.80 to -2.518	Yes	*	0.0132
	200 μM	-17.33	-29.77 to -4.896	Yes	**	0.0031
	Test details	Predicted (LS) mean 1	Predicted (LS) mean 2	Predicted (LS) mean diff.	SE of diff.	N1	N2	t	DF
	sib - cav1.3a-/-
	75 μM	44.43	59.05	-14.63	5.114	18	18	2.86	101
	100 μM	37.46	52.61	-15.16	5.206	16	19	2.912	101
	200 μM	23.79	41.12	-17.33	5.122	19	17	3.384	101

## Sheet: Figure 2E
Figure 2E	% cells surviving neomycin per neuromast otof
		sibling
	75 μM	38.89	38.89	50	41.67	62.5	57.14	31.25	37.5	33.33	60	62.5	50	43.75	56.25
	100 μM	50	20	38.89	25	35.71	28.57	35.71	31.25	42.86	35.71	42.86	33.33	42.86	38.89	16.67	43.75
	200 μM	12.5	16.67	14.29	11.11	11.11	26.67	17.65	25	20	33.33	25	31.82	35	25.53
		otofb
	75 μM	69.23	62.5	80	56.25	65	61.11	64.71	68.75	58.33	100	66.66	50	61.11	54.54
	100 μM	44.44	50	43.75	46.15	56.25	38.46	61.54	57.89	68.75	57.14	37.5	41.18	58.33
	200 μM	35	23.53	50	42.86	23.53	12.5	18.75	28.57	13.33	23.08	42.86	25	50	23.08	23.53	42.86
		sib			otofb
		mean	SEM	N (neuromasts)	mean	SEM	N (neuromasts)
	75 μM	47.405	2.91763	14	65.585	3.29167	14
	100 μM	35.1287	2.27083	16	50.8754	2.7133	13
	200 μM	21.8343	2.20376	14	29.905	3.08227	16
	2-way ANOVA
	Sidak's multiple comparisons test	Predicted (LS) mean diff.	95.00% CI of diff.	Significant?	Summary	Adjusted P Value
	sib - otofb-/-
	75 μM	-18.18	-27.93 to -8.428	Yes	****	<0.0001
	100 μM	-15.75	-25.38 to -6.112	Yes	***	0.0004
	200 μM	-8.071	-17.51 to 1.372	No	ns	0.1161
	Test details	Predicted (LS) mean 1	Predicted (LS) mean 2	Predicted (LS) mean diff.	SE of diff.	N1	N2	t	DF
	sib - otofb-/-
	75 μM	47.41	65.59	-18.18	4	14	14	4.545	81
	100 μM	35.13	50.88	-15.75	3.951	16	13	3.985	81
	200 μM	21.83	29.91	-8.071	3.873	14	16	2.084	81

## Sheet: Figure 2F
Figure 2F	% cells surviving neomycin per neuromast acute isradipine or dynole treatment
	DMSO	isradipine	dynole
	50	33.33	46.67
	22.22	50	12.5
	40	26.67	33.33
	47.37	52.94	50
	50	31.25	44.44
	46.67	42.86	30
	25	40	45
	25	33.33	61.11
	53.33	15	61.11
	25	5	50
	43.75	20	50
	31.25	20	12.5
	28.57	35	23.08
	26.32	27.78	41.18
	11.76	45	43.75
	25	29.41	61.11
	52.94	35	33.33
	50	43.75	41.18
	25	47.37	35.71
	55.56	37.5	38.46
	22.22	44.44	31.25
	18.75	27.78	36.84
	43.75	33.33	18.75
	40	37.5	20
	33.33	43.75
	35.71	27.78
	21.43	33.33
	35.29	43.75
	28.57	26.32
	35.71	45.45
	11.77	37.5
	29.41	22.22
		18.75
		36.84
Number of neuromasts	32	34	24
Minimum	11.76	5	12.5
Maximum	55.56	52.94	61.11
Range	43.8	47.94	48.61
Mean	34.08	33.82	38.39
Std. Deviation	12.42	10.77	14.18
Std. Error of Mean	2.196	1.846	2.895
D'Agostino & Pearson test
K2	3.27	2.033	0.4458
P value	0.1949	0.3618	0.8002
Passed normality test (alpha=0.05)?	Yes	Yes	Yes
P value summary	ns	ns	ns
one-way ANOVA
Dunnett's multiple comparisons test	Mean Diff.	95.00% CI of diff.	Significant?	Summary	Adjusted P Value	A-?
DMSO vs. isradipine	2.537	-7.937 to 13.01	No	ns	0.8003	B	isradipine
DMSO vs. dynole	-3.935	-13.64 to 5.770	No	ns	0.552	C	dynole
Test details	Mean 1	Mean 2	Mean Diff.	SE of diff.	n1	n2	q	DF
DMSO vs. isradipine	34.45	31.92	2.537	4.627	16	17	0.5483	54
DMSO vs. dynole	34.45	38.39	-3.935	4.287	16	24	0.9179	54

## Sheet: Figure 2G
Figure 2G	% cells surviving neomycin per neuromast 24 hr isradipine or dynole treatment
	DMSO	isradipine	dynole
	33.33	60	26.67
	28.57	38.89	40
	15.38	69.23	66.67
	33.33	38.46	40
	50	50	52.94
	50	50	50
	33.33	26.67	53.33
	33.33	52.94	50
	25	42.86	37.5
	25	53.33	31.25
	56.25	33.33	31.25
	16.67	50	28.57
	41.17	46.67	35.29
	25	46.67	27.78
	41.18	37.5	40
	33.33	31.25	50
	27.78	35.29	46.15
	25.53	20	58.82
	31.25	23.08	46.67
	33.33	25	33.33
	33.33	26.67	22.22
	25	33.33	31.25
	33.33	31.25	43.75
	16.67	23.08	26.67
	14.29	53.33	37.5
	31.25	60	28.57
	25	42.86	53.85
	25	50	50
	38.89	31.25	35.71
	18.75	18.75	28.57
		35.71	43.75
Number of neuromasts	30	31	31
Minimum	14.29	18.75	22.22
Maximum	56.25	69.23	66.67
Range	41.96	50.48	44.45
Mean	30.68	39.92	40.26
Std. Deviation	10.2	12.98	11.03
Std. Error of Mean	1.862	2.332	1.981
D'Agostino & Pearson test
K2	2.747	1.186	1.432
P value	0.2532	0.5527	0.4888
Passed normality test (alpha=0.05)?	Yes	Yes	Yes
P value summary	ns	ns	ns
one-way ANOVA
Dunnett's multiple comparisons test	Mean Diff.	95.00% CI of diff.	Significant?	Summary	Adjusted P Value	A-?
DMSO vs. isradipine	-9.24	-15.84 to -2.637	Yes	**	0.0044	B	isradipine
DMSO vs. dynole	-9.584	-16.19 to -2.980	Yes	**	0.0031	C	dynole
Test details	Mean 1	Mean 2	Mean Diff.	SE of diff.	n1	n2	q	DF
DMSO vs. isradipine	30.68	39.92	-9.24	2.939	30	31	3.144	89
DMSO vs. dynole	30.68	40.26	-9.584	2.939	30	31	3.261	89

## Sheet: Figure 2H
Figure 2H	% cells surviving neomycin per neuromast 48 hr isradipine or dynole treatment
	DMSO	isradipine	dynole
	26.3	22.2	36.8
	38.9	27.8	53.3
	23.5	37.5	43.75
	12.5	37.5	23.5
	16.7	47.1	25
	27.8	31.25	30
	23.5	33.3	44.4
	25	22.2	46.7
	11.1	25	38.9
	27.8	31.25	40
	18.75	40	44.44
	25	38.9	22.22
	42.86	50	52.94
	30.77	37.5	68.75
	43.75	66.67	44.44
	31.82	57.14	58.82
	29.41	66.67	30.77
	55.56	66.67	30.77
	25	50
	31.25	43.75
	35.71	38.46
	47.82
	25
	45
	28.57
	27.77
	11.11
	22.22
	25
Number of values	29	21	18
Minimum	11.1	22.2	22.22
Maximum	55.56	66.67	68.75
Range	44.46	44.47	46.53
Mean	28.81	41.47	40.86
Std. Deviation	10.78	13.92	12.66
Std. Error of Mean	2.001	3.037	2.984
D'Agostino & Pearson test
K2	2.194	1.628	0.6347
P value	0.3338	0.4431	0.7281
Passed normality test (alpha=0.05)?	Yes	Yes	Yes
P value summary	ns	ns	ns
one-way ANOVA
Dunnett's multiple comparisons test	Mean Diff.	95.00% CI of diff.	Significant?	Summary	Adjusted P Value	A-?
DMSO vs. dynole	-12.66	-20.67 to -4.648	Yes	**	0.0013	B	dynole
DMSO vs. isradipine	-12.05	-20.44 to -3.661	Yes	**	0.0035	C	isradipine
Test details	Mean 1	Mean 2	Mean Diff.	SE of diff.	n1	n2	q	DF
DMSO vs. dynole	28.81	41.47	-12.66	3.527	29	21	3.589	65
DMSO vs. isradipine	28.81	40.86	-12.05	3.694	29	18	3.263	65
