# Supplementary material for: Chronic neurotransmission increases the susceptibility of lateral-line hair cells to ototoxic insults
Source: eLife. 2022 Sep 1;11:e77775. doi: 10.7554/eLife.77775 (PMC9473691; doi:10.7554/eLife.77775)
Supplement: Figure 3—source data 1. [file elife-77775-fig3-data1.xlsx]

## Sheet: Figure 3B
Figure 3	Mean Neomycin-Texas Red intensity after 10 min of labeling
	sib	cav1.3a-/-	sib	otofb-/-
	406.68	276.194	885.146	493.115
	338.273	253.882	858.457	1271.21
	428.023	407.698	1193.1	863.983
	172.791	206.437	1170.59	697.004
	150.342	137.524	1224.92	1338.19
	144.503	123.376	843.894	1186.04
	831.661	780.915	1002.56	710.524
	990.089	613.831	730.484	448.367
	616.748	596.634	758.124	575.279
	510.801	447.858	715.95	1094.73
	518.981	257.935	937.831	750.126
	663.417	287.619	846.54	436.394
	579.287	582.752	317.049	630.339
	871.628	407.572	642.915	365.424
	920.918	336.054	550.307	310.516
	1082.36	669.124	671.627	418.588
	1063.56	1049.4	700.751	376.712
	937.394	949.668	562.26	367.019
	791.286	927.729	482.75	835.496
	741.239	788.909	924.757	661.551
	493.43	688.99	624.56	743.015
	494.763	585.755	607.423	549.509
	461.745	650.693	650.757	413.931
	473.185	522.368	624.91	409.537
	325.491	407.035		426.907
		618.796
		521.055
Number of values	25	27	24	25
Minimum	144.5	123.4	317	310.5
Maximum	1082	1049	1225	1338
Range	937.9	926	907.9	1028
Mean	600.3	522.1	772	654.9
Std. Deviation	279.9	248.4	226.7	298.9
Std. Error of Mean	55.98	47.8	46.28	59.77
D'Agostino & Pearson test
K2	1.648	0.7903	0.8455	4.934
P value	0.4387	0.6736	0.6552	0.0849
Passed normality test (alpha=0.05)?	Yes	Yes	Yes	Yes
P value summary	ns	ns	ns	ns
	Column B	cav1.3a-/-	Column D	otofb-/-
	vs.	vs.	vs.	vs.
	Column A	sib	Column C	sib
	Unpaired t test		Unpaired t test
	P value	0.2905	P value	0.1303
	P value summary	ns	P value summary	ns
	Significantly different (P < 0.05)?	No	Significantly different (P < 0.05)?	No
	One- or two-tailed P value?	Two-tailed	One- or two-tailed P value?	Two-tailed
	t, df	t=1.068, df=50	t, df	t=1.540, df=47

## Sheet: Figure 3C
Figure 3D	comparison of Neo-Texas Red uptake curves sibs vs cav1.3
time (min)	sib			cav1.3a-/-
0	0	0	22	0	0	23
1	54.3974	6.36608	22	61.8166	7.39062	23
2	122.884	13.2274	22	130.97	14.2026	23
3	190.573	19.6388	22	203.13	22.7521	23
4	254.572	25.1743	22	265.481	29.2424	23
5	309.692	30.833	22	316.683	35.3437	23
6	357.972	36.0468	22	352.89	39.2556	23
7	394.657	39.7241	22	385.758	44.0194	23
8	424.401	42.0538	22	404.98	46.3675	23
9	446.545	43.5106	22	419.523	48.4922	23
10	465.208	44.5382	22	433.476	50.1729	23
2-way ANOVA
Sidak's multiple comparisons test	Mean Diff.	95.00% CI of diff.	Significant?	Summary	Adjusted P Value
sib - cav1.3a-/-
Row 1	0
Row 2	-7.419	-36.57 to 21.73	No	ns	0.9986
Row 3	-8.086	-66.04 to 49.87	No	ns	>0.9999
Row 4	-12.56	-102.4 to 77.26	No	ns	>0.9999
Row 5	-10.91	-126.2 to 104.4	No	ns	>0.9999
Row 6	-6.992	-147.1 to 133.2	No	ns	>0.9999
Row 7	5.082	-154.1 to 164.3	No	ns	>0.9999
Row 8	8.899	-168.2 to 186.0	No	ns	>0.9999
Row 9	19.42	-167.5 to 206.4	No	ns	>0.9999
Row 10	27.02	-167.6 to 221.6	No	ns	>0.9999
Row 11	31.73	-168.7 to 232.2	No	ns	>0.9999
Test details	Mean 1	Mean 2	Mean Diff.	SE of diff.	N1	N2	t	DF
sib - cav1.3a-/-
Row 1	0	0	0	0	22	23
Row 2	54.4	61.82	-7.419	9.754	22	23	0.7606	42.34
Row 3	122.9	131	-8.086	19.41	22	23	0.4166	42.9
Row 4	190.6	203.1	-12.56	30.06	22	23	0.4178	42.36
Row 5	254.6	265.5	-10.91	38.59	22	23	0.2827	42.33
Row 6	309.7	316.7	-6.992	46.9	22	23	0.1491	42.46
Row 7	358	352.9	5.082	53.3	22	23	0.09536	42.84
Row 8	394.7	385.8	8.899	59.29	22	23	0.1501	42.73
Row 9	424.4	405	19.42	62.6	22	23	0.3103	42.77
Row 10	446.5	419.5	27.02	65.15	22	23	0.4148	42.69
Row 11	465.2	433.5	31.73	67.09	22	23	0.473	42.61

## Sheet: Figure 3D
Figure 3E	comparison of Neo-Texas Red uptake clearnace curves sibs vs cav1.3
time (min)	sib			cav1.3a-/-
0	0	0	18	0	0	26
1.5	-9.50167	4.859	18	-3.22596	2.2562	26
3	-14.4771	6.40344	18	-6.8425	3.12405	26
4.5	-18.9319	7.94712	18	-17.2766	5.01734	26
6	-26.9389	10.3715	18	-25.721	6.22555	26
7.5	-34.8682	11.9009	18	-33.7351	7.18287	26
9	-46.0212	13.4876	18	-41.4757	8.35133	26
10.5	-58.9134	15.4884	18	-53.3141	10.5636	26
12	-65.9773	16.9832	18	-61.9187	11.6981	26
13.5	-75.4906	18.5465	18	-70.594	12.8339	26
15	-84.3907	21.1285	18	-76.9214	14.281	26
16.5	-88.2908	21.8143	18	-85.6521	15.1564	26
18	-94.4102	22.5939	18	-91.1676	16.0818	26
19.5	-102.237	24.2732	18	-99.727	17.2913	26
21	-107.067	25.0314	18	-103.89	18.3572	26
22.5	-112.691	25.8845	18	-109.207	18.2662	26
24	-122.007	26.9793	18	-114.906	18.8082	26
25.5	-128.918	28.2198	18	-119.265	19.9944	26
27	-134.219	28.7705	18	-124.72	20.7384	26
28.5	-141.06	29.8469	18	-128.711	21.1079	26
30	-147.436	30.4911	18	-132.881	21.7144	26
2-way ANOVA
Sidak's multiple comparisons test	Predicted (LS) mean diff.	95.00% CI of diff.	Significant?	Summary	Adjusted P Value
sib - cav1.3a-/-
Row 1	-2.842e-14	-74.09 to 74.09	No	ns	>0.9999
Row 2	-6.276	-80.37 to 67.82	No	ns	>0.9999
Row 3	-7.635	-81.73 to 66.46	No	ns	>0.9999
Row 4	-1.655	-75.75 to 72.44	No	ns	>0.9999
Row 5	-1.218	-75.31 to 72.87	No	ns	>0.9999
Row 6	-1.133	-75.23 to 72.96	No	ns	>0.9999
Row 7	-4.545	-78.64 to 69.55	No	ns	>0.9999
Row 8	-5.599	-79.69 to 68.49	No	ns	>0.9999
Row 9	-4.059	-78.15 to 70.03	No	ns	>0.9999
Row 10	-4.897	-78.99 to 69.20	No	ns	>0.9999
Row 11	-7.469	-81.56 to 66.62	No	ns	>0.9999
Row 12	-2.639	-76.73 to 71.45	No	ns	>0.9999
Row 13	-3.243	-77.34 to 70.85	No	ns	>0.9999
Row 14	-2.51	-76.60 to 71.58	No	ns	>0.9999
Row 15	-3.177	-77.27 to 70.92	No	ns	>0.9999
Row 16	-3.484	-77.58 to 70.61	No	ns	>0.9999
Row 17	-7.102	-81.19 to 66.99	No	ns	>0.9999
Row 18	-9.653	-83.75 to 64.44	No	ns	>0.9999
Row 19	-9.499	-83.59 to 64.59	No	ns	>0.9999
Row 20	-12.35	-86.44 to 61.74	No	ns	>0.9999
Row 21	-14.56	-88.65 to 59.54	No	ns	>0.9999
Test details	Predicted (LS) mean 1	Predicted (LS) mean 2	Predicted (LS) mean diff.	SE of diff.	N1	N2	t	DF
sib - cav1.3a-/-
Row 1	-2.842e-14	0	-2.842e-14	24.38	18	26	1.166e-15	882
Row 2	-9.502	-3.226	-6.276	24.38	18	26	0.2574	882
Row 3	-14.48	-6.843	-7.635	24.38	18	26	0.3132	882
Row 4	-18.93	-17.28	-1.655	24.38	18	26	0.0679	882
Row 5	-26.94	-25.72	-1.218	24.38	18	26	0.04996	882
Row 6	-34.87	-33.74	-1.133	24.38	18	26	0.04648	882
Row 7	-46.02	-41.48	-4.545	24.38	18	26	0.1865	882
Row 8	-58.91	-53.31	-5.599	24.38	18	26	0.2297	882
Row 9	-65.98	-61.92	-4.059	24.38	18	26	0.1665	882
Row 10	-75.49	-70.59	-4.897	24.38	18	26	0.2009	882
Row 11	-84.39	-76.92	-7.469	24.38	18	26	0.3064	882
Row 12	-88.29	-85.65	-2.639	24.38	18	26	0.1082	882
Row 13	-94.41	-91.17	-3.243	24.38	18	26	0.133	882
Row 14	-102.2	-99.73	-2.51	24.38	18	26	0.103	882
Row 15	-107.1	-103.9	-3.177	24.38	18	26	0.1303	882
Row 16	-112.7	-109.2	-3.484	24.38	18	26	0.1429	882
Row 17	-122	-114.9	-7.102	24.38	18	26	0.2913	882
Row 18	-128.9	-119.3	-9.653	24.38	18	26	0.396	882
Row 19	-134.2	-124.7	-9.499	24.38	18	26	0.3897	882
Row 20	-141.1	-128.7	-12.35	24.38	18	26	0.5066	882
Row 21	-147.4	-132.9	-14.56	24.38	18	26	0.5971	882

## Sheet: Figure 3E
Figure 3F	comparison of Neo-Texas Red uptake curves sibs vs otofb
time(min)	sib			otofb-/-
0	0	0	21	0	0	22
1	91.6791	7.11155	21	74.5315	7.5073	22
2	189.02	8.73741	21	175.899	14.2059	22
3	295.219	13.1239	21	264.65	20.3067	22
4	396.196	17.8677	21	348.056	29.0401	22
5	475.33	22.0945	21	407.608	37.2325	22
6	531.824	24.632	21	451.112	43.3687	22
7	575.044	27.487	21	486.032	49.6218	22
8	610.818	30.0138	21	508.517	53.5289	22
9	642.286	31.6826	21	525.329	55.5952	22
10	663.94	33.7715	21	539.103	57.8445	22
2-way ANOVA
Sidak's multiple comparisons test	Mean Diff.	95.00% CI of diff.	Significant?	Summary	Adjusted P Value
sib - otofb-/-
Row 1	0
Row 2	17.15	-13.81 to 48.11	No	ns	0.7045
Row 3	13.12	-37.34 to 63.58	No	ns	0.9982
Row 4	30.57	-42.45 to 103.6	No	ns	0.9296
Row 5	48.14	-55.02 to 151.3	No	ns	0.8658
Row 6	67.72	-63.46 to 198.9	No	ns	0.7756
Row 7	80.71	-70.68 to 232.1	No	ns	0.7395
Row 8	89.01	-83.36 to 261.4	No	ns	0.7734
Row 9	102.3	-84.08 to 288.7	No	ns	0.7049
Row 10	117	-77.25 to 311.2	No	ns	0.5838
Row 11	124.8	-78.25 to 327.9	No	ns	0.5557
Test details	Mean 1	Mean 2	Mean Diff.	SE of diff.	N1	N2	t	DF
sib - otofb-/-
Row 1	0	0	0	0	21	22
Row 2	91.68	74.53	17.15	10.34	21	22	1.658	40.96
Row 3	189	175.9	13.12	16.68	21	22	0.7867	34.68
Row 4	295.2	264.6	30.57	24.18	21	22	1.264	35.67
Row 5	396.2	348.1	48.14	34.1	21	22	1.412	34.69
Row 6	475.3	407.6	67.72	43.29	21	22	1.564	33.97
Row 7	531.8	451.1	80.71	49.88	21	22	1.618	33.12
Row 8	575	486	89.01	56.73	21	22	1.569	32.64
Row 9	610.8	508.5	102.3	61.37	21	22	1.667	32.87
Row 10	642.3	525.3	117	63.99	21	22	1.828	33.18
Row 11	663.9	539.1	124.8	66.98	21	22	1.864	33.65

## Sheet: Figure 3F
Figure 3E	comparison of Neo-Texas Red uptake clearnace curves sibs vs otof
time (min)	sib			otofb-/-
0	0	0	14	0	0	14
1.5	-0.568714	4.89185	14	-6.70407	3.89899	14
3	-13.3427	6.08848	14	-19.4184	8.31967	14
4.5	-19.0698	6.68922	14	-29.1208	10.8171	14
6	-33.5626	9.15898	14	-39.8046	13.876	14
7.5	-39.2424	9.92875	14	-52.9948	15.7647	14
9	-58.2039	11.4316	14	-62.8446	17.398	14
10.5	-67.1802	13.5015	14	-71.9207	21.7887	14
12	-78.5222	15.2832	14	-78.9666	24.4814	14
13.5	-90.8717	15.5305	14	-88.9731	26.5281	14
15	-102.666	16.5532	14	-98.7252	28.6187	14
16.5	-110.015	15.941	14	-108.201	29.5208	14
18	-121.342	18.5376	14	-118.921	31.484	14
19.5	-131.633	17.7948	14	-124.51	33.4331	14
21	-137.665	18.6926	14	-127.437	35.1163	14
22.5	-148.869	19.918	14	-135.502	35.7863	14
24	-157.448	20.7965	14	-145.071	38.0546	14
25.5	-162.204	22.2379	14	-146.737	39.5876	14
27	-165.099	22.7659	14	-151.388	40.1096	14
28.5	-177.848	24.2678	14	-154.068	42.1679	14
30	-184.767	25.3977	14	-157.102	42.8715	14
2-way ANOVA
Sidak's multiple comparisons test	Mean Diff.	95.00% CI of diff.	Significant?	Summary	Adjusted P Value
sib - otofb-/-
Row 1	0
Row 2	6.135	-14.97 to 27.24	No	ns	0.9998
Row 3	6.076	-28.86 to 41.02	No	ns	>0.9999
Row 4	10.05	-33.55 to 53.66	No	ns	>0.9999
Row 5	6.242	-50.49 to 62.97	No	ns	>0.9999
Row 6	13.75	-50.04 to 77.54	No	ns	>0.9999
Row 7	4.641	-66.41 to 75.69	No	ns	>0.9999
Row 8	4.74	-83.13 to 92.61	No	ns	>0.9999
Row 9	0.4444	-98.43 to 99.32	No	ns	>0.9999
Row 10	-1.899	-107.7 to 104.0	No	ns	>0.9999
Row 11	-3.941	-117.9 to 110.0	No	ns	>0.9999
Row 12	-1.814	-118.1 to 114.5	No	ns	>0.9999
Row 13	-2.421	-128.2 to 123.3	No	ns	>0.9999
Row 14	-7.123	-138.6 to 124.3	No	ns	>0.9999
Row 15	-10.23	-148.3 to 127.8	No	ns	>0.9999
Row 16	-13.37	-155.0 to 128.2	No	ns	>0.9999
Row 17	-12.38	-162.6 to 137.8	No	ns	>0.9999
Row 18	-15.47	-172.3 to 141.4	No	ns	>0.9999
Row 19	-13.71	-172.9 to 145.5	No	ns	>0.9999
Row 20	-23.78	-191.5 to 144.0	No	ns	>0.9999
Row 21	-27.66	-199.1 to 143.8	No	ns	>0.9999
Test details	Mean 1	Mean 2	Mean Diff.	SE of diff.	N1	N2	t	DF
sib - otofb-/-
Row 1	0	0	0	0	14	14
Row 2	-0.5687	-6.704	6.135	6.256	14	14	0.9808	24.77
Row 3	-13.34	-19.42	6.076	10.31	14	14	0.5893	23.82
Row 4	-19.07	-29.12	10.05	12.72	14	14	0.7903	21.67
Row 5	-33.56	-39.8	6.242	16.63	14	14	0.3754	22.52
Row 6	-39.24	-52.99	13.75	18.63	14	14	0.7382	21.91
Row 7	-58.2	-62.84	4.641	20.82	14	14	0.2229	22.46
Row 8	-67.18	-71.92	4.74	25.63	14	14	0.1849	21.7
Row 9	-78.52	-78.97	0.4444	28.86	14	14	0.0154	21.8
Row 10	-90.87	-88.97	-1.899	30.74	14	14	0.06176	20.97
Row 11	-102.7	-98.73	-3.941	33.06	14	14	0.1192	20.82
Row 12	-110	-108.2	-1.814	33.55	14	14	0.05406	19.99
Row 13	-121.3	-118.9	-2.421	36.54	14	14	0.06626	21.05
Row 14	-131.6	-124.5	-7.123	37.87	14	14	0.1881	19.82
Row 15	-137.7	-127.4	-10.23	39.78	14	14	0.2571	19.82
Row 16	-148.9	-135.5	-13.37	40.96	14	14	0.3264	20.35
Row 17	-157.4	-145.1	-12.38	43.37	14	14	0.2854	20.13
Row 18	-162.2	-146.7	-15.47	45.41	14	14	0.3406	20.46
Row 19	-165.1	-151.4	-13.71	46.12	14	14	0.2973	20.59
Row 20	-177.8	-154.1	-23.78	48.65	14	14	0.4888	20.76
Row 21	-184.8	-157.1	-27.66	49.83	14	14	0.5552	21.12
