# Supplementary material for: Chronic neurotransmission increases the susceptibility of lateral-line hair cells to ototoxic insults
Source: eLife. 2022 Sep 1;11:e77775. doi: 10.7554/eLife.77775 (PMC9473691; doi:10.7554/eLife.77775)
Supplement: Figure 4—figure supplement 1—source data 1. [file elife-77775-fig4-figsupp1-data1.xlsx]

## Sheet: Figure 4-S1 B
Figure 4-S1C kinocilium height (in um) in DAPI- and DAPI+ cells at 5 dpf (from 8 neuromasts)
	DAPI-	DAPI+
	21.5	23.5
	18	27.5
	17.5	21.5
	17.5	24
	13	24
	2.5	24
	2.5	22
	20.5	23.5
	20.5	21.5
	13.5	21.5
	16.5	23
	20	23.5
	18.5	23
	4	21
	4	21.5
	19	24.5
	19.5	26.5
	19.5	21.5
	22.5	24.5
	13	24.5
	11	24.5
	21	24.5
	22	22.5
	15.5	24.5
	10.5	26.5
	23.5	21
	15.5	22
	15.5	24.5
	22.5	20.5
	19	23.5
	17	25
	20.5	21.5
	17	24
	13.5	22.5
	21.5	21.5
	7.5	23.5
	9.5	22.5
	14.5	20
	15	24.5
	10.5	22
	11.5	24.5
	17	23.5
	18	25
	1.5	25
	1.5	24
	20	26.5
	19.5	24
	16.5	24
	21	24.5
	8	24
	9	26.5
	23	26.5
	18	26
	1.5	27
	1.5	24.5
	16	24.5
	17.5	22.5
	11	20.5
	17	24.5
	20.5	24.5
	11	24.5
	22	22.5
	21	23.5
	1	22
	1
Number of hair cells	65	64
Minimum	1	20
Maximum	23.5	27.5
Range	22.5	7.5
Mean	14.64	23.63
Std. Deviation	6.656	1.725
Std. Error of Mean	0.8256	0.2156
D'Agostino & Pearson test
K2	7.491	0.4902
P value	0.0236	0.7826
Passed normality test (alpha=0.05)?	No	Yes
P value summary	*	ns
Mann Whitney test
P value	<0.0001
Exact or approximate P value?	Exact
P value summary	****
Significantly different (P < 0.05)?	Yes
One- or two-tailed P value?	Two-tailed
Sum of ranks in column A,B	2297 , 6089
Mann-Whitney U	151.5

## Sheet: Figure 4-S1E-E`
Figure 4-S1E-E' kinocilium height (in um) vs hair cell survival after 100 uM neomycin
	% of Hair cells surviving per neuromast
	younger + older		younger	older
	55.55		70	12.5
	33.33		33.33	8.03
	27.78		40	23.08
	22.22		75	14.29
	44.44		75	0
	35		85.71	7.69
	25		50	50
	18.75		100	0
Number of neuromasts	8		8	8
Minimum	18.75		33.33	0
Maximum	55.55		100	50
Range	36.8		66.67	50
Mean	32.76		66.13	14.45
Std. Deviation	12.27		23.06	16.24
Std. Error of Mean	4.337		8.152	5.742
D'Agostino & Pearson test
K2	1.668		0.5137	8.868
P value	0.4342		0.7735	0.0119
Passed normality test (alpha=0.05)?	Yes		Yes	No
P value summary	ns		ns	*
			Mann Whitney test
			P value	0.0112
			Exact or approximate P value?	Exact
			P value summary	*
			Significantly different (P < 0.05)?	Yes
			One- or two-tailed P value?	Two-tailed
			Sum of ranks in column A,B	91.50 , 44.50
			Mann-Whitney U	8.5
