# Supplementary material for: Chronic neurotransmission increases the susceptibility of lateral-line hair cells to ototoxic insults
Source: eLife. 2022 Sep 1;11:e77775. doi: 10.7554/eLife.77775 (PMC9473691; doi:10.7554/eLife.77775)
Supplement: Figure 4—source data 1. [file elife-77775-fig4-data1.xlsx]

## Sheet: Figure 4B
Figure 4B % of cells surviving neomycin per neuromast based on activity state
		active
	75 μM	75	85.7	100	100	85.71	100	66.67	85.71	75	100	100	83.33	87.5
	100 μM	75	80	62.5	83.33	66.67	50	83.33	66.69	66.67	66.67	33.33	75
		inactive
	75 μM	62.5	44.44	77.78	46.67	69.23	66.67	60	70	78.57	45.45	75	57.14	60
	100 μM	33.33	20	0	25	45.45	40	60	33.33	20	25	33.33	16.67
	active			inactive
	mean	SEM	N (neuromasts)	mean	SEM	N (neuromasts)
75 μM	88.0477	3.15292	13	62.5731	3.27727	13
100 μM	67.4325	4.14823	12	29.3425	4.4334	12
D'Agostino & Pearson test
	active	active	inactive	inactive
	75 μM	100 μM	75 μM	100 μM
K2	0.9921	5.921	1.219	0.8793
P value	0.6089	0.0518	0.5437	0.6443
Passed normality test (alpha=0.05)?	Yes	Yes	Yes	Yes
P value summary	ns	ns	ns	ns
2-way ANOVA
Sidak's multiple comparisons test	Predicted (LS) mean diff.	95.00% CI of diff.	Significant?	Summary	Adjusted P Value
active - inactive
75 μM	25.47	13.45 to 37.50	Yes	****	<0.0001
100 μM	38.09	25.57 to 50.61	Yes	****	<0.0001

## Sheet: Figure 4E
Figure 4E % of DAPI+ cells (older) per neuromast based on activity state
	active	inactive
	0	90.9
	0	55.56
	20	75
	14.29	77.78
	40	90.9
	11.11	90.9
	27.27	100
	0	83.33
	0	90.9
	40	60
	25	87.5
	0	88.89
	20	71.43
	28.57	88.89
	0	90.9
	28.57	87.5
	28.57	80
	38.46	80
	33.33	83.33
	36.36	100
Number of neuromasts	20	20
Minimum	0	55.56
Maximum	40	100
Range	40	44.44
Mean	19.58	83.69
Std. Deviation	15.2	11.51
Std. Error of Mean	3.4	2.573
D'Agostino & Pearson test
K2	6.886	5.475
P value	0.032	0.0647
Passed normality test (alpha=0.05)?	No	Yes
P value summary	*	ns
Mann Whitney test
P value	<0.0001
Exact or approximate P value?	Exact
P value summary	****
Significantly different (P < 0.05)?	Yes
One- or two-tailed P value?	Two-tailed
Sum of ranks in column A,B	210 , 610
Mann-Whitney U	0
