# Supplementary material for: Chronic neurotransmission increases the susceptibility of lateral-line hair cells to ototoxic insults
Source: eLife. 2022 Sep 1;11:e77775. doi: 10.7554/eLife.77775 (PMC9473691; doi:10.7554/eLife.77775)
Supplement: Figure 5—figure supplement 1—source data 1. [file elife-77775-fig5-figsupp1-data1.xlsx]

## Sheet: Figure 5-S1B
Figure 5-S1B Hair cell counts sib vs cav1.3 mutants
		sib
	3 dpf	10	10	10	12	12	12	10	10	12	12	10
	5 dpf	14	16	16	15	16	16	16	16	14	17	18
		cav1.3
	3 dpf	12	12	10	10	10	12	10	13	10	12	12
	5 dpf	14	20	17	15	14	18	16	19	17	15	20
		sib			cav1.3a-/-
	3 dpf	10.9091	0.314918	11	11.1818	0.352089	11
	5 dpf	15.8182	0.352089	11	16.8182	0.671744	11
2-way ANOVA
Sidak's multiple comparisons test	Mean Diff.	95.00% CI of diff.	Significant?	Summary	Adjusted P Value
sib - cav1.3a-/-
3 dpf	-0.2727	-1.741 to 1.195	No	ns	0.89
5 dpf	-1	-2.468 to 0.4680	No	ns	0.228
Test details	Mean 1	Mean 2	Mean Diff.	SE of diff.	N1	N2	t	DF
sib - cav1.3a-/-
3 dpf	10.91	11.18	-0.2727	0.6318	11	11	0.4317	40
5 dpf	15.82	16.82	-1	0.6318	11	11	1.583	40

## Sheet: Figure 5-S1C
Figure 5-S1C kinocilial height measurements to age hair cells in sibs vs cav1.3 mutants
		sibling
	All	2.5	2.5	4	4	7.5	9.5	10.5	11	13	13	13.5	13.5	15.5	15.5	15.5	16.5	17	17	17.5	17.5	18	18.5	19	19	19.5	19.5	20	20	20.5	20.5	20.5	20.5	21	21	21	21.5	21.5	21.5	21.5	21.5	21.5	21.5	21.5	21.5	22	22	22	22.5
	young	2.5	2.5	4	4	7.5	9.5	10.5	11	13	13	13.5	13.5	15.5	15.5	15.5	16.5	17	17	17.5	17.5	18	18.5	19	19	19.5	19.5	20	20
	mature	20.5	20.5	20.5	20.5	21	21	21	21.5	21.5	21.5	21.5	21.5	21.5	21.5	21.5	21.5	22	22	22	22.5	22.5	22.5	22.5	22.5	23	23	23.5	23.5	23.5	23.5	23.5	23.5	24	24	24	24	24.5	24.5	24.5	24.5	24.5	24.5	24.5	24.5	25	26.5	26.5	27.5
		cav1.3
	All	1.5	2	2	2	3	3	6.5	6.5	7	8	9	10	10	11	11	11	11.5	14	15	15	16.5	16.5	16.5	16.5	17.5	17.5	18	18.5	18.5	19	19.5	20	20	20	20	20	20	20	21	21	21	21.5	21.5	22	22.5	22.5	22.5	22.5
	young	1.5	2	2	2	3	3	6.5	6.5	7	8	9	10	10	11	11	11	11.5	14	15	15	16.5	16.5	16.5	16.5	17.5	17.5	18	18.5	18.5	19	19.5
	mature	20	20	20	20	20	20	20	21	21	21	21.5	21.5	22	22.5	22.5	22.5	22.5	22.5	23	23	23	23	23	23	23	23	23.5	24	24	24	24	24	24	24	24.5	24.5	24.5	24.5	24.5	24.5	24.5	24.5	24.5	25	25	25	25	25
		sib			cav1.3a-/-
	All	19.625	0.648488	76	19.35	0.730957	90
	young	13.9286	1.04455	28	11.4032	1.07374	31
	mature	22.9479	0.243369	48	23.5254	0.254252	59
2-way ANOVA
Sidak's multiple comparisons test	Predicted (LS) mean diff.	95.00% CI of diff.	Significant?	Summary	Adjusted P Value
sib - cav1.3a-/-
All	0.275	-1.682 to 2.232	No	ns	0.9816
young	2.525	-0.7494 to 5.800	No	ns	0.1829
mature	-0.5775	-3.019 to 1.864	No	ns	0.9208
Test details	Predicted (LS) mean 1	Predicted (LS) mean 2	Predicted (LS) mean diff.	SE of diff.	N1	N2	t	DF
sib - cav1.3a-/-
All	19.63	19.35	0.275	0.8153	76	90	0.3373	326
young	13.93	11.4	2.525	1.364	28	31	1.851	326
mature	22.95	23.53	-0.5775	1.017	48	59	0.5677	326
[truncated: 42 more columns]

## Sheet: Figure 5-S1D
Figure 5-S1D % of DAPI+ hair cells remaining per neuromast from 3 to 5 dpf in sibs vs cav1.3 mutants
	sib	cav1.3a-/-
	100	100
	100	100
	100	100
	90	100
	100	100
	100	100
	100	87.5
	100	100
	100	87.5
	100	87.5
	100	100
	sib	cav1.3a-/-
Number of values	11	11
Minimum	90	87.5
Maximum	100	100
Range	10	12.5
Mean	99.09	96.59
Std. Deviation	3.015	5.839
Std. Error of Mean	0.9091	1.76
	sib	cav1.3a-/-
Test for normal distribution
D'Agostino & Pearson test
K2	31.15	3.507
P value	<0.0001	0.1732
Passed normality test (alpha=0.05)?	No	Yes
P value summary	****	ns
Mann Whitney test
P value	0.2143
Exact or approximate P value?	Exact
P value summary	ns
Significantly different (P < 0.05)?	No
One- or two-tailed P value?	Two-tailed
Sum of ranks in column A,B	139 , 114
Mann-Whitney U	48
Difference between medians
Median of column A	100.0, n=11
Median of column B	100.0, n=11
Difference: Actual	0
Difference: Hodges-Lehmann	0

## Sheet: Figure 5-S1E
Figure 5-S1B Hair cell counts sib vs otofb mutants
		sib
	3 dpf	14	12	10	10	12	12	12	12	13	11	11	11	8
	5 dpf	20	18	18	16	18	18	18	16	19	19	15	19	16
		otofb
	3 dpf	14	10	10	10	10	11	12	10	10	12	12	11	12	12
	5 dpf	19	18	20	20	18	18	18	18	18	16	20	17	16	17
		sib			otofb-/-
	3 dpf	11.3846	0.416617	13	11.1429	0.32912	14
	5 dpf	17.6923	0.414243	13	18.0714	0.354938	14
2-way ANOVA
Sidak's multiple comparisons test	Predicted (LS) mean diff.	95.00% CI of diff.	Significant?	Summary	Adjusted P Value
sib - otofb-/-
3 dpf	0.2418	-0.9919 to 1.475	No	ns	0.8798
5 dpf	-0.3791	-1.613 to 0.8545	No	ns	0.7316
Test details	Predicted (LS) mean 1	Predicted (LS) mean 2	Predicted (LS) mean diff.	SE of diff.	N1	N2	t	DF
sib - otofb-/-
3 dpf	11.38	11.14	0.2418	0.5351	13	14	0.4518	50
5 dpf	17.69	18.07	-0.3791	0.5351	13	14	0.7086	50

## Sheet: Figure 5-S1F
Figure 5-S1F kinocilial height measurements to age hair cells in sibs vs otofb mutants
		sibling
	All	2	2	6	7	8.5	9	9.5	10	10	10.5	11.5	12.5	15	15	16.5	17	17	17	17	18	18	18.5	19	19	19.5	19.5	20	20	20.5	20.5	20.5	20.5	20.5	21	21	21	21.5	21.5	21.5	22	22	22	22	22	22	22	22	22.5
	young	2	2	6	7	8.5	9	9.5	10	10	10.5	11.5	12.5	15	15	16.5	17	17	17	17	18	18	18.5	19	19	19.5	19.5
	mature	20	20	20.5	20.5	20.5	20.5	20.5	21	21	21	21.5	21.5	21.5	22	22	22	22	22	22	22	22	22.5	22.5	22.5	22.5	22.5	23	23	23	23	23	23	23	23	23	23	23	23.5	23.5	23.5	23.5	24	24	24	24	24	24	24.5
	All	2	3	3	5	10	10.5	11	11.5	12.5	13.5	13.5	13.5	14	14.5	16	16.5	17	17	17	18.5	19.5	20.5	20.5	20.5	20.5	21	21.5	21.5	21.5	21.5	22	22	22	22	22	22	22	22	22.5	22.5	22.5	22.5	22.5	22.5	23	23	23	23
	young	2	3	3	5	10	10.5	11	11.5	12.5	13.5	13.5	13.5	14	14.5	16	16.5	17	17	17	18.5	19.5
	mature	20.5	20.5	20.5	20.5	21	21.5	21.5	21.5	21.5	22	22	22	22	22	22	22	22	22.5	22.5	22.5	22.5	22.5	22.5	23	23	23	23	23.5	23.5	23.5	23.5	23.5	24	24	24	24	24	24	24	24.5	24.5	24.5	24.5	25	25	25	25	25
		sib			otofb-/-
	All	20.0402	0.586492	87	20.6646	0.634325	82
	young	13.25	1.05366	26	12.3333	1.13721	21
	mature	22.9344	0.197136	61	23.5328	0.215477	61
2-way ANOVA
Sidak's multiple comparisons test	Predicted (LS) mean diff.	95.00% CI of diff.	Significant?	Summary	Adjusted P Value
sib - otofb-/-
All	-0.6244	-2.299 to 1.050	No	ns	0.7517
young	0.9167	-2.275 to 4.109	No	ns	0.8683
mature	-0.5984	-2.568 to 1.372	No	ns	0.8482
Test details	Predicted (LS) mean 1	Predicted (LS) mean 2	Predicted (LS) mean diff.	SE of diff.	N1	N2	t	DF
sib - otofb-/-
All	20.04	20.66	-0.6244	0.6977	87	82	0.8949	332
young	13.25	12.33	0.9167	1.33	26	21	0.6892	332
mature	22.93	23.53	-0.5984	0.8209	61	61	0.7289	332
[truncated: 39 more columns]

## Sheet: Figure 5-S1G
Figure 5-S1G % of DAPI+ hair cells remaining per neuromast from 3 to 5 dpf in sibs vs otofb mutants
	sib	otofb-/-
	100	90
	100	100
	100	100
	100	100
	100	100
	100	100
	100	100
	100	100
	100	100
	100	87.5
	100	100
	100	100
	100	100
		100
	sib	otofb-/-
Number of values	13	14
Minimum	100	87.5
Maximum	100	100
Range	0	12.5
Mean	100	98.39
Std. Deviation	0	4.115
Std. Error of Mean	0	1.1
D'Agostino & Pearson test
K2	Invalid input data	17.78
P value		0.0001
Passed normality test (alpha=0.05)?		No
P value summary		***
Mann Whitney test
P value	0.4815
Exact or approximate P value?	Exact
P value summary	ns
Significantly different (P < 0.05)?	No
One- or two-tailed P value?	Two-tailed
Sum of ranks in column A,B	195 , 183
Mann-Whitney U	78
Difference between medians
Median of column A	100.0, n=13
Median of column B	100.0, n=14
Difference: Actual	0
Difference: Hodges-Lehmann	0
