# Supplementary material for: Chronic neurotransmission increases the susceptibility of lateral-line hair cells to ototoxic insults
Source: eLife. 2022 Sep 1;11:e77775. doi: 10.7554/eLife.77775 (PMC9473691; doi:10.7554/eLife.77775)
Supplement: Figure 5—figure supplement 2—source data 1. [file elife-77775-fig5-figsupp2-data1.xlsx]

## Sheet: Figure 5-S2B` C`
Figure 5-S2B' and C' Evoked mitoGCaMP3 responses man (deltaF/F)
	sib	cav1.3a-/-	sib	otofb-/-
	19.3595	9.6384	87.5668	31.1324
	39.962	0	113.237	44.0594
	29.5246	0	44.5028	14.9684
	29.6489	0	107.406	13.0689
	18.0662	0	28.3207	35.1337
	36.5642	0	57.779	8.8894
	18.3461	0	107.624	30.6466
	43.2457	0	18.4862	47.6783
	23.3724	0	29.7403	43.5278
	31.8217	0	42.6128	48.7899
	21.1291	0	25.4898	23.3051
	18.8186	0	52.4398	26.0082
	18.7889	0	11.8465	41.295
	36.9248	0	42.6351	22.3129
	25.2781	0	19.8892	47.2955
	49.259	0	104.368	41.0979
	24.7011	0	31.4783	26.4164
	55.5239	0	60.0647	26.6799
	35.7669	0	40.9592	41.1681
	84.3874	0	50.0954	33.1741
	28.0809	0	44.4552	114.869
	29.2893	0	28.2571	142.894
	16.025	0	48.1543	130.258
	21.178	0	25.1081	67.8388
	42.4473	0	113.606	121.395
	56.1453	0	37.3439	23.4004
	32.812	0	36.1264	129.371
	33.9139	0	44.9317	85.9676
	45.3152	0	53.6643	35.6304
	85.0642	0	50.4108	39.3441
	28.8242	0	25.7203	178.767
	49.5385	0	16.7815	57.3418
	25.3865	0	49.8594	33.6964
	107.941	0	50.0683	116.591
	19.2852	0	20.4783	97.8973
	13.3427	0	67.4594	34.1811
	19.3472	0	19.3823	47.9462
	24.7367	0	67.6503	45.5682
	62.7643	0	76.3034	137.03
	40.2312	0	21.2479	54.7131
	52.5691	0	17.1171	30.4493
	40.8618	0	75.0288	28.8831
	31.429	0	15.9259	44.2129
	13.7321	0	24.7316	72.4876
	35.3251	0	52.1803	68.7772
	41.9568		37.9406	19.3116
	41.978	0	17.4816	12.3853
	15.1659	0
	30.9601	0
	59.7856	0
	47.7251	0
	38.3375	0
	35.4522	0
	34.4653	0
	48.0858	0
	41.9378	0
	25.8879	0
	21.5877	0
	52.8417	0
	54.2008	0
	17.7028	0
Number of hair cells	61	60	47	47
Minimum	13.34	0	11.85	8.889
Maximum	107.9	9.638	113.6	178.8
Range	94.6	9.638	101.8	169.9
Mean	36.46	0.1606	47.11	55.7
Std. Deviation	18.17	1.244	28	40.74
Std. Error of Mean	2.327	0.1606	4.085	5.943
D'Agostino & Pearson test
K2	27.83	132.4	8.559	13.47
P value	<0.0001	<0.0001	0.0139	0.0012
Passed normality test (alpha=0.05)?	No	No	No	No
P value summary	****	****	*	**
	Mann Whitney test
	P value	<0.0001		0.5774
	Exact or approximate P value?	Exact		Exact
	P value summary	****		ns
	Significantly different (P < 0.05)?	Yes		No
	One- or two-tailed P value?	Two-tailed		Two-tailed
	Sum of ranks in column A,B	5551 , 1830		2158 , 2307
	Mann-Whitney U	0		1030
