# Supplementary material for: Chronic neurotransmission increases the susceptibility of lateral-line hair cells to ototoxic insults
Source: eLife. 2022 Sep 1;11:e77775. doi: 10.7554/eLife.77775 (PMC9473691; doi:10.7554/eLife.77775)
Supplement: Figure 5—figure supplement 3—source data 1. [file elife-77775-fig5-figsupp3-data1.xlsx]

## Sheet: Figure 5-S2B` C`
Figure 5-S3C JC-1 ratio measurements
	sib	caV1.3a-/-	otofb-/-
	0.265028	0.321304	0.374782
	0.488889	0.271846	0.214718
	0.309984	0.26751	0.42687
	0.375567	0.225592	0.278183
	0.313092	0.256725	0.262073
	0.336652	0.339681	0.330111
	0.296741	0.475078	0.356635
	0.388752	0.292536	0.336455
	0.402926	0.329572	0.295442
	0.335362	0.169368	0.332768
	0.380412	0.441243	0.357161
	0.47029	0.465655	0.452145
	0.493426	0.476672	0.530747
	0.534444	0.505293	0.505735
	0.52069	0.59102	0.469099
	0.514104	0.271854	0.417034
	0.498393	0.262947	0.445213
	0.367208	0.387529	0.438545
	0.439134	0.397559
	0.555842	0.349066
	0.506433
Number of neuromasts	21	20	18
Minimum	0.265	0.1694	0.2147
Maximum	0.5558	0.591	0.5307
Range	0.2908	0.4217	0.316
Mean	0.4187	0.3549	0.3791
Std. Deviation	0.08989	0.1093	0.08723
Std. Error of Mean	0.01962	0.02443	0.02056
D'Agostino & Pearson test
K2	5.536	0.9344	0.4704
P value	0.0628	0.6267	0.7904
Passed normality test (alpha=0.05)?	Yes	Yes	Yes
P value summary	ns	ns	ns
one-way ANOVA
Dunnett's multiple comparisons test	Mean Diff.	95.00% CI of diff.	Significant?	Summary	Adjusted P Value	A-?
sib vs. caV1.3a-/-	0.06383	-0.004440 to 0.1321	No	ns	0.0699	B	caV1.3a-/-
sib vs. otofb-/-	0.03964	-0.03055 to 0.1098	No	ns	0.3423	C	otofb-/-
Test details	Mean 1	Mean 2	Mean Diff.	SE of diff.	n1	n2	q	DF
sib vs. caV1.3a-/-	0.4187	0.3549	0.06383	0.03004	21	20	2.125	56
sib vs. otofb-/-	0.4187	0.3791	0.03964	0.03089	21	18	1.283	56
Number of hair cells				47
Minimum				8.889
Maximum				178.8
Range				169.9
Mean				55.7
Std. Deviation				40.74
Std. Error of Mean				5.943
D'Agostino & Pearson test
K2				13.47
P value				0.0012
Passed normality test (alpha=0.05)?				No
P value summary				**
				0.5774
				Exact
				ns
				No
				Two-tailed
				2158 , 2307
				1030
