# Supplementary material for: Chronic neurotransmission increases the susceptibility of lateral-line hair cells to ototoxic insults
Source: eLife. 2022 Sep 1;11:e77775. doi: 10.7554/eLife.77775 (PMC9473691; doi:10.7554/eLife.77775)
Supplement: Figure 5—source data 1. [file elife-77775-fig5-data1.xlsx]

## Sheet: Figure 5D
Figure 5D Cell Rox Orange mean intensity
	sib	cav1.3a-/-	sib	otofb-/-
	417.664	268.401	315.742	288.263
	407.978	341.011	357.5	211.438
	282.225	323.242	352.889	248.869
	406.672	293.712	343.201	299.753
	410.766	357.249	349.586	269.163
	451.254	405.622	333.431	212.487
	407.828	429.856	265.151	488.188
	386.136	425.877	612.157	592.149
	404.342	309.571	662.978	287.63
	439.023	300.526	491.88	479.871
	448.168	325.311	416.762	429.519
	466.399	479.002	615.919	379.223
	366.316	461.569	697.796	464.119
	639.125	517.654	573.78	342.522
	694.132	268.401	503.502	267.381
	702.418		385.31	199.893
			241.192	177.86
			191.411	262.427
			264.769	225.982
			321.832	203.729
			315.875	239.147
			273.531	281.031
			316.691	266.8
			267.051
Number of neuromasts	16	15	24	23
Minimum	282.2	268.4	191.4	177.9
Maximum	702.4	517.7	697.8	592.1
Range	420.2	249.3	506.4	414.3
Mean	458.2	367.1	394.6	309.5
Std. Deviation	117.7	80.2	144.3	110.7
Std. Error of Mean	29.42	20.71	29.46	23.08
D'Agostino & Pearson test
K2	5.435	1.925	3.338	5.676
P value	0.066	0.3819	0.1885	0.0585
Passed normality test (alpha=0.05)?	Yes	Yes	Yes	Yes
P value summary	ns	ns	ns	ns
	Unpaired t test		Unpaired t test
	P value	0.0184	P value	0.0286
	P value summary	*	P value summary	*
	Significantly different (P < 0.05)?	Yes	Significantly different (P < 0.05)?	Yes
	One- or two-tailed P value?	Two-tailed	One- or two-tailed P value?	Two-tailed
	t, df	t=2.499, df=29	t, df	t=2.262, df=45

## Sheet: Figure 5H
Figure 5H MitoSOX mean intensity
	sib	cav1.3a-/-	sib	otofb-/-
	529.927	455.931	523.492	486.121
	635.84	579.769	732.893	429.558
	824.986	677.269	896.75	716.826
	897.301	657.149	566.978	421.622
	729.489	607.119	699.285	432.183
	676.07	501.372	994.152	532.083
	860.972	702.753	827.888	563.885
	1120.35	671.712	709.981	610.197
	942.487	534.901	929.21	589.312
	593.943	696.27	580.452	596.846
	749.005	640.713	654.989	526.557
				641.846
				407.994
Number of neuromasts	11	11	11	13
Minimum	529.9	455.9	523.5	408
Maximum	1120	702.8	994.2	716.8
Range	590.4	246.8	470.7	308.8
Mean	778.2	611.4	737.8	535
Std. Deviation	172.3	83.44	156.4	96.13
Std. Error of Mean	51.94	25.16	47.17	26.66
D'Agostino & Pearson test
K2	0.6829	1.532	1.112	0.5609
P value	0.7108	0.465	0.5735	0.7554
Passed normality test (alpha=0.05)?	Yes	Yes	Yes	Yes
P value summary	ns	ns	ns	ns
	Unpaired t test		Unpaired t test
	P value	0.009	P value	0.0008
	P value summary	**	P value summary	***
	Significantly different (P < 0.05)?	Yes	Significantly different (P < 0.05)?	Yes
	One- or two-tailed P value?	Two-tailed	One- or two-tailed P value?	Two-tailed
	t, df	t=2.891, df=20	t, df	t=3.894, df=22

## Sheet: Figure 5L
Figure 5L TMRE mean intensity
	sib	cav1.3a-/-	sib	otofb-/-
	1354.64	1076.77	2149.57	2412.87
	1348.92	1212.38	2093.94	2076.72
	1311.74	1266.64	2274.78	2056.5
	1403.76	1072.22	2743.85	1766.34
	1603.25	966.58	2462.83	2070.62
	1681.11	1313.72	2265.52	1861.22
	1516.02	1406.39	1871.65	1873.97
	2176.78	1369.54	2597.4	2138.8
	2209.64	1997.47	2612.36	1790.61
	2046.94	1956.58	2371.29	1701.26
	2169	1862.2	2343.25	1555.78
	2079.24	1481.57	1965.49	1318.36
	1587.32	1638.6	1850.76	1776.53
	1487.05	1470.32	2066.37	1692.66
Number of neruomast	16	16	14	14
Minimum	1312	966.6	1851	1318
Maximum	2210	1997	2744	2413
Range	897.9	1031	893.1	1095
Mean	1717	1441	2262	1864
Std. Deviation	325.3	305.3	279.4	273.6
Std. Error of Mean	81.32	76.32	74.68	73.12
D'Agostino & Pearson test
K2	4.589	0.7111	0.784	0.4792
P value	0.1008	0.7008	0.6757	0.7869
Passed normality test (alpha=0.05)?	Yes	Yes	Yes	Yes
P value summary	ns	ns	ns	ns
	Unpaired t test		Unpaired t test
	P value	0.0193	P value	0.0008
	P value summary	*	P value summary	***
	Significantly different (P < 0.05)?	Yes	Significantly different (P < 0.05)?	Yes
	One- or two-tailed P value?	Two-tailed	One- or two-tailed P value?	Two-tailed
	t, df	t=2.473, df=30	t, df	t=3.811, df=26
