# Supplementary material for: Chronic neurotransmission increases the susceptibility of lateral-line hair cells to ototoxic insults
Source: eLife. 2022 Sep 1;11:e77775. doi: 10.7554/eLife.77775 (PMC9473691; doi:10.7554/eLife.77775)
Supplement: Figure 6—source data 1. [file elife-77775-fig6-data1.xlsx]

## Sheet: Figure 6D
Figure 6D MitoTimer 561/488 ratio mean intensity cav1.3 vs sibling
		siblings
	3 dpf	0.119505	0.14593	0.147724	0.19345	0.184672	0.220006	0.191501	0.278285	0.186079	0.260551	0.112237	0.162497	0.156764
	5 dpf	0.990789	0.975825	0.98212	1.02966	1.14682	1.1075	1.41173	1.31862	0.795922	0.819548	0.634083	0.606125
	6 dpf	1.88357	1.97558	1.67657	1.65466	1.86557	1.33143	1.49835	1.592	1.41887	2.23203	2.4348	1.82879	2.80264
		cav1.3
	3 dpf	0.11916	0.07029	0.138632	0.11562	0.09382	0.136584	0.092934	0.162981	0.263421	0.087113	0.12485	0.190967	0.06044	0.077648	0.125346
	5 dpf	0.59529	0.395561	0.595241	0.848548	0.472094	0.300315	0.866794	0.676911	0.704855	0.606376	0.633514	0.62461	0.792616
	6 dpf	0.858328	1.04601	0.802081	0.402801	1.0168	0.862092	1.28654	1.01485	0.852887	1.02969
		sib			cav1.3a-/-
		mean	SEM	n (neuromasts)	mean	SEM	n (neuromasts)
	3 dpf	0.181477	0.0137264	13	0.123987	0.0134909	15
	5 dpf	0.984896	0.0710595	12	0.624056	0.0459392	13
	6 dpf	1.86114	0.116703	13	0.917208	0.0725421	10
2-way ANOVA
Sidak's multiple comparisons test	Predicted (LS) mean diff.	95.00% CI of diff.	Significant?	Summary	Adjusted P Value
sib - cav1.3a-/-
3 dpf	0.05749	-0.1545 to 0.2695	No	ns	0.8818
5 dpf	0.3608	0.1369 to 0.5848	Yes	***	0.0006
6 dpf	0.9439	0.7086 to 1.179	Yes	****	<0.0001
Test details	Predicted (LS) mean 1	Predicted (LS) mean 2	Predicted (LS) mean diff.	SE of diff.	N1	N2	t	DF
sib - cav1.3a-/-
3 dpf	0.1815	0.124	0.05749	0.08667	13	15	0.6633	70
5 dpf	0.9849	0.6241	0.3608	0.09156	12	13	3.941	70
6 dpf	1.861	0.9172	0.9439	0.0962	13	10	9.812	70
Range	420.2	249.3	506.4	414.3
Mean	458.2	367.1	394.6	309.5
Std. Deviation	117.7	80.2	144.3	110.7
Std. Error of Mean	29.42	20.71	29.46	23.08
D'Agostino & Pearson test
K2	5.435	1.925	3.338	5.676
P value	0.066	0.3819	0.1885	0.0585
Passed normality test (alpha=0.05)?	Yes	Yes	Yes	Yes
P value summary	ns	ns	ns	ns
	Unpaired t test		Unpaired t test
	P value	0.0184	P value	0.0286
	P value summary	*	P value summary	*
	Significantly different (P < 0.05)?	Yes	Significantly different (P < 0.05)?	Yes
	One- or two-tailed P value?	Two-tailed	One- or two-tailed P value?	Two-tailed
	t, df	t=2.499, df=29	t, df	t=2.262, df=45

## Sheet: Figure 6E
Figure 6E MitoTimer 561/488 ratio mean intensity otof vs sibling
		siblings
	3 dpf	0.064267	0.077189	0.131468	0.110648	0.053232	0.102571	0.096137	0.171507	0.078778	0.077018	0.108707	0.165447	0.176444
	5 dpf	0.864369	0.986279	0.840808	1.00846	0.910249	0.766053	0.888005	1.36599	0.77289	1.03579	1.05305	0.698714	0.977864	1.18263
	6 dpf	2.21153	3.97536	2.64503	1.37958	2.45569	3.92133	3.07326	2.88223	2.50398	2.16558	2.18263	2.1537	1.52	2.12668	2.34372	1.17094
		cav1.3
	3 dpf	0.060679	0.108566	0.08833	0.090522	0.111067	0.07074	0.0956	0.118577	0.129089	0.086357	0.077587	0.099106	0.17936	0.088645
	5 dpf	0.580927	0.711828	0.741016	0.801974	0.322399	0.461981	0.534446	0.503743	0.453862	0.878083	0.516694	0.390765	0.466787	0.52162
	6 dpf	1.16474	0.758965	1.10329	0.953337	0.504425	0.569016	0.436425	0.696996	0.738784	0.724795
		sib			otofba-/-
		mean	SEM	n (neuromasts)	mean	SEM	n (neuromasts)
	3 dpf	0.108724	0.0114396	13	0.100302	0.00782703	14
	5 dpf	0.953654	0.0470852	14	0.563295	0.0430726	14
	6 dpf	2.41945	0.195282	16	0.765077	0.076807	10
2-way ANOVA
Sidak's multiple comparisons test	Predicted (LS) mean diff.	95.00% CI of diff.	Significant?	Summary	Adjusted P Value
sib - otofb-/-
3 dpf	0.008422	-0.3428 to 0.3596	No	ns	0.9999
5 dpf	0.3904	0.04570 to 0.7350	Yes	*	0.0213
6 dpf	1.654	1.287 to 2.022	Yes	****	<0.0001
Test details	Predicted (LS) mean 1	Predicted (LS) mean 2	Predicted (LS) mean diff.	SE of diff.	N1	N2	t	DF
sib - otofb-/-
3 dpf	0.1087	0.1003	0.008422	0.1438	13	14	0.05856	75
5 dpf	0.9537	0.5633	0.3904	0.1411	14	14	2.766	75
6 dpf	2.419	0.7651	1.654	0.1505	16	10	10.99	75
Range	420.2	249.3	506.4	414.3
Mean	458.2	367.1	394.6	309.5
Std. Deviation	117.7	80.2	144.3	110.7
Std. Error of Mean	29.42	20.71	29.46	23.08
D'Agostino & Pearson test
K2	5.435	1.925	3.338	5.676
P value	0.066	0.3819	0.1885	0.0585
Passed normality test (alpha=0.05)?	Yes	Yes	Yes	Yes
P value summary	ns	ns	ns	ns
	Unpaired t test		Unpaired t test
	P value	0.0184	P value	0.0286
	P value summary	*	P value summary	*
	Significantly different (P < 0.05)?	Yes	Significantly different (P < 0.05)?	Yes
	One- or two-tailed P value?	Two-tailed	One- or two-tailed P value?	Two-tailed
	t, df	t=2.499, df=29	t, df	t=2.262, df=45
