# Supplementary material for: Chronic neurotransmission increases the susceptibility of lateral-line hair cells to ototoxic insults
Source: eLife. 2022 Sep 1;11:e77775. doi: 10.7554/eLife.77775 (PMC9473691; doi:10.7554/eLife.77775)
Supplement: Figure 7—source data 1. [file elife-77775-fig7-data1.xlsx]

## Sheet: Figure 7A
Figure 7A % cells surviving neomycin treatment after isradipine pretreatment sibs vs otofb
		DMSO control
	sib	50	14.29	27.78	42.86	28.57	18.75	44.44	21.43	14.29	28.57	35.71
	otofb-/-	43.75	50	52.63	29.41	53.85	66.67	33.33	57.14	43.75	50
		Isradipine treated
	sib	38.46	68.75	61.54	61.54	43.75	30.77	50	25	28.57	42.86
	otofb-/-	47.1	69.23	38.46	20	37.5	81.25	71.43	38.46	53.85	42.86	50	46.15	76.9
	Control			isradipine
	mean	SEM	n (neuromasts)	mean	SEM	n (neuromasts)
	29.6991	3.70274	11	45.124	4.78122	10
	48.053	3.48435	10	51.7838	4.99966	13
2-way ANOVA
Sidak's multiple comparisons test	Predicted (LS) mean diff.	95.00% CI of diff.	Significant?	Summary	Adjusted P Value
sib:Control vs. sib:isradipine	-15.42	-33.11 to 2.262	No	ns	0.1167
sib:Control vs. otofb-/-:Control	-18.35	-36.04 to -0.6666	Yes	*	0.0384
sib:Control vs. otofb-/-:isradipine	-22.08	-38.67 to -5.501	Yes	**	0.0041
sib:isradipine vs. otofb-/-:Control	-2.929	-21.03 to 15.17	No	ns	0.9984
sib:isradipine vs. otofb-/-:isradipine	-6.66	-23.69 to 10.37	No	ns	0.867
otofb-/-:Control vs. otofb-/-:isradipine	-3.731	-20.76 to 13.30	No	ns	0.9914
Test details	Predicted (LS) mean 1	Predicted (LS) mean 2	Predicted (LS) mean diff.	SE of diff.	N1	N2	t	DF
sib:Control vs. sib:isradipine	29.7	45.12	-15.42	6.391	11	10	2.414	40
sib:Control vs. otofb-/-:Control	29.7	48.05	-18.35	6.391	11	10	2.872	40
sib:Control vs. otofb-/-:isradipine	29.7	51.78	-22.08	5.992	11	13	3.686	40
sib:isradipine vs. otofb-/-:Control	45.12	48.05	-2.929	6.541	10	10	0.4478	40
sib:isradipine vs. otofb-/-:isradipine	45.12	51.78	-6.66	6.152	10	13	1.082	40
otofb-/-:Control vs. otofb-/-:isradipine	48.05	51.78	-3.731	6.152	10	13	0.6064	40
